# Supplementary material for: Is palliative care support associated with better quality end-of-life care indicators for patients with advanced cancer? A retrospective cohort study
Source: PubMed Central journal article supplement — BMJ Open. 2018 Jan 31;8(1):e018284. doi: 10.1136/bmjopen-2017-018284 (PMC5829853; doi:10.1136/bmjopen-2017-018284), 2018-01-31
Supplement: bmjopen-2017-018284.draft_revisions.pdf [file bmjopen-2017-018284.draft_revisions.pdf]

# BMJ Open

BMJ Open is committed to open peer review. As part of this commitment we make the peer review history of every article we publish publicly available.

When an article is published we post the peer reviewers' comments and the authors' responses online. We also post the versions of the paper that were used during peer review. These are the versions that the peer review comments apply to.

The versions of the paper that follow are the versions that were submitted during the peer review process. They are not the versions of record or the final published versions. They should not be cited or distributed as the published version of this manuscript.

BMJ Open is an open access journal and the full, final, typeset and author-corrected version of record of the manuscript is available on our site with no access controls, subscription charges or pay-per-view fees (<http://bmjopen.bmj.com>).

If you have any questions on BMJ Open's open peer review process please email [editorial.bmjopen@bmj.com](mailto:editorial.bmjopen@bmj.com)

# BMJ Open

## **Is palliative care support associated with better quality outcomes at end of life for patients with advanced cancer? A longitudinal population cohort study**

|                               |                                                                                                                                                                                                                                                                                                                                                                                                                                                                                    |
|-------------------------------|------------------------------------------------------------------------------------------------------------------------------------------------------------------------------------------------------------------------------------------------------------------------------------------------------------------------------------------------------------------------------------------------------------------------------------------------------------------------------------|
| Journal:                      | <i>BMJ Open</i>                                                                                                                                                                                                                                                                                                                                                                                                                                                                    |
| Manuscript ID                 | bmjopen-2017-018284                                                                                                                                                                                                                                                                                                                                                                                                                                                                |
| Article Type:                 | Research                                                                                                                                                                                                                                                                                                                                                                                                                                                                           |
| Date Submitted by the Author: | 19-Jun-2017                                                                                                                                                                                                                                                                                                                                                                                                                                                                        |
| Complete List of Authors:     | Ziegler, Lucy; University of Leeds, Leeds Institute of Health Sciences<br>Craigs , Cheryl; University of Leeds, Leeds Institute of Health Sciences<br>West, Robert; University of Leeds, Biostatistics<br>Carder, Paul ; NHS Bradford and Districts CCGs<br>Hurlow, Adam; Leeds General Infirmary<br>Millares Martin, Pablo; Whitehall Surgery,<br>Hall, Geoff; St James's University Teaching Hospital,<br>Bennett, Mike; University of Leeds, Leeds Institute of Health Sciences |
| Keywords:                     | PALLIATIVE CARE, ONCOLOGY, end of life care, transitions in cancer care                                                                                                                                                                                                                                                                                                                                                                                                            |
|                               |                                                                                                                                                                                                                                                                                                                                                                                                                                                                                    |

SCHOLARONE™  
Manuscripts

Peer Review Only

## Title

Is palliative care support associated with better quality outcomes at end of life for patients with advanced cancer? A longitudinal population cohort study

## Authors

Dr Lucy E Ziegler<sup>1</sup>, University Academic Fellow

Dr Cheryl L Craigs<sup>1</sup>, Senior Statistician

Prof Robert M West<sup>2</sup>, Professor of Biostatistics

Mr Paul Carder<sup>3</sup>, Head of Research

Dr Adam Hurlow<sup>4</sup>, Consultant in Palliative Medicine

Dr Pablo Millares-Martin<sup>5</sup>, End of Life Clinical Lead

Dr Geoff Hall<sup>4</sup>, Lead Clinician for Cancer Services

Prof Michael I Bennett<sup>1</sup>, Professor of Palliative Medicine

1. Academic Unit of Palliative Care, Leeds Institute of Health Sciences, University of Leeds, Worsley Building, Clarendon Way, Leeds, LS2 9NL, UK
2. Health Services Research, Leeds Institute of Health Sciences, University of Leeds, Worsley Building, Clarendon Way, Leeds, LS2 9NL, UK
3. NHS Bradford Districts Clinical Commissioning Group, Douglas Mill, Bowling Old Lane, Bradford, BD5 7JR, UK
4. Leeds General Infirmary, Great George St, Leeds, LS1 3EX, UK
5. Leeds West Clinical Commissioning Group, Suites B5-B9, Wira House, Wira Business Park, Leeds, LS16 6EB, UK

## Corresponding Author

Dr Lucy E Ziegler, [L.E.Ziegler@leeds.ac.uk](mailto:L.E.Ziegler@leeds.ac.uk), +44 (0) 113 343 7351

The Corresponding Author has the right to grant on behalf of all authors and does grant on behalf of all authors, a worldwide licence to the Publishers and its licensees in perpetuity, in

1  
2  
3 all forms, formats and media (whether known now or created in the future), to i) publish,  
4 reproduce, distribute, display and store the Contribution, ii) translate the Contribution into  
5 other languages, create adaptations, reprints, include within collections and create  
6 summaries, extracts and/or, abstracts of the Contribution, iii) create any other derivative  
7 work(s) based on the Contribution, iv) to exploit all subsidiary rights in the Contribution, v)  
8 the inclusion of electronic links from the Contribution to third party material where-ever it  
9 may be located; and, vi) licence any third party to do any or all of the above.  
10  
11  
12  
13  
14  
15  
16  
17  
18  
19  
20  
21  
22  
23  
24  
25  
26  
27  
28  
29  
30  
31  
32  
33  
34  
35  
36  
37  
38  
39  
40  
41  
42  
43  
44  
45  
46  
47  
48  
49  
50  
51  
52  
53  
54  
55  
56  
57

## Abstract

### Objectives

This study aims to establish whether palliative care is associated with better quality outcomes at the end of life for patients with advanced cancer and to explore the duration of palliative care involvement in relation to quality of end of life care.

### Setting

This study uses linked cancer patient data from the National Cancer Registry, the electronic medical record system used in primary care (SystemOne) and the electronic medical record system used within a specialist regional cancer centre. The population resided in a single city in Northern England.

### Participants

Retrospective data from 2479 adult cancer patients who died between January 2010 and February 2012, were registered with a primary care provider using the SystemOne electronic health record system, and cancer was certified as a cause of death, were included in the study.

### Results

Linkage yielded data on 2479 cancer patients, with 64.5% who received at least one PC event. Patients who received PC were significantly more likely to die in a hospice (39.4% versus 14.5%) and less likely to die in hospital (23.3% versus 40.1%), and were more likely to receive an opioid (53.9% versus 25.2%). Duration of PC was significantly associated with avoiding emergency hospital admissions ( $\geq 4$  weeks) avoiding late chemotherapy ( $\geq 33$  weeks) access to an opioid ( $\geq 4$  weeks) and avoiding death in hospital ( $\geq 2$  weeks).

### Conclusion

For patients with advanced cancer, access to palliative care and longer duration of palliative care were significantly associated with better quality outcomes at the end of life. These findings provide evidence to support earlier integration of palliative care within oncology service delivery models.

1  
2  
3 (Word count 263 words)  
4  
5  
6

### 7 **Strengths and limitations of this study**

8  
9

- 10 • To the best of our knowledge this is the first UK study to explore the associations  
11 between duration of palliative care and quality of end of life care in a large  
12 population of patients who died from cancer.
- 13 • The data used in this study are derived from a live clinical system and as such are  
14 likely to represent errors or omissions inherent within that system.
- 15 • The definition of good quality end of life care used in this study is informed by UK  
16 policy and guidance on end of life care provision. We recognise that what constitutes  
17 good quality care at the end of life can vary by individual and that the study does not  
18 capture individual preferences or circumstances.  
19  
20  
21  
22  
23  
24  
25  
26  
27  
28  
29  
30  
31  
32  
33  
34  
35  
36  
37  
38  
39  
40  
41  
42  
43  
44  
45  
46  
47  
48  
49  
50  
51  
52  
53  
54  
55  
56  
57

## Introduction

Integration of palliative care alongside oncology management should be considered early in the course of illness for patients with metastatic cancer or high symptom burden, according to American Society of Clinical Oncology guidelines.<sup>1</sup> This recommendation is based on a number of randomised controlled trials, largely from North America, which found early palliative care was associated with improved quality of life and a reduction in acute hospital admissions and aggressive cancer treatments at the end of life.<sup>2-6</sup> Though there were inconsistencies across trials, in general common characteristics were an assessment and several follow up consultations by specialist palliative care teams over a period of 2–3 months, which occurred about 6–14 months before patients died.

Compared to patients recruited to these clinical trials, cancer patients in routine care are often referred to palliative care services much later in the course of their illness.<sup>7</sup> We recently showed that for 4650 cancer patients in Leeds, median contact was 34 days for community and hospital palliative care services.<sup>8</sup> This relatively short duration of palliative care in routine services might adversely impact on end of life outcomes.

Systematic reviews and pooled analyses of routinely collected data have demonstrated an association between palliative care intervention and increased proportion of home deaths as well as reduction in emergency admissions.<sup>9,10</sup> However, no study has quantified these associations in relation to duration of palliative care. In order to more directly inform models of service delivery, better quality data is needed on how long patients with cancer need to receive palliative care before important improvements in end of life care can be observed.

We report a retrospective cohort study that linked routinely collected data on hospital and community healthcare resource use in patients that died from cancer.

We chose this study design because it enabled us to examine the effects of palliative care service delivery in routine care for a cohort of cancer patients and minimised recruitment bias from a clinical trial design. We wanted to test the hypothesis that contact with and longer duration of palliative care would be associated with better quality outcomes at end of life for patients with advanced cancer.

## Methods

### Study population

Retrospective data from 2479 adult (aged at least 18 years at death) cancer patients who died between January 2010 and February 2012, resided within a single UK city, were registered with a primary care provider using the SystemOne electronic health record system, and cancer was certified as a cause of death, were included in the study.

### Data collection

Data was obtained from three sources, the Northern and Yorkshire Cancer Registry and Information Service (NYCRIS), SystemOne, and the Patient Pathway Manager (PPM). NYCRIS maintain a database of all cancers occurring in the Northern and Yorkshire region in England. SystemOne is an electronic health record system used by approximately 75% of primary care providers in Leeds. PPM is a clinical information system used at a regional specialist cancer centre to manage and coordinate patient care.

Patients eligible for the study were identified from the NYCRIS database based on address, date of death, and cause of death. The NYCRIS database provided all demographic, diagnostic, and death information. SystemOne provided opioid prescription information and community palliative care provision. PPM provided chemotherapy treatment, emergency hospital admissions and hospital based palliative care referral information. The three data sources were linked using an open pseudonymiser system to create an encrypted code based on NHS numbers.

### Assessment of palliative care provision

The primary measure of palliative care provision used in this study was duration of palliative care, measured as the time in weeks, between the first recorded palliative care event and date of death. Both hospital and community based records of palliative care events were included.

The PPM system provided information on hospital based palliative care provision. For each patient included in our study every unique palliative care referral date recorded on the PPM system was identified as a unique palliative care event. Community palliative care provision was estimated from SystemOne records based on a multistage approach. In the first stage any record within SystemOne which included a palliative care based READ code or included



1  
2  
3 text indicating palliative care, based on a keyword search, was included in the study. In the  
4 second stage only records which extended up to date of death and included either a READ  
5 code indicating the active provision of palliative care, or included communication with a  
6 hospice, were identified as representing palliative care provision.  
7  
8  
9

10 The total number of palliative care events identified for each patient was a secondary  
11 measure of palliative care provision which was used as a proxy to indicate the intensity of  
12 palliative care support provided.  
13  
14

### 15 **Outcomes**

16  
17 The end of life quality outcomes assessed were place of death, access to strong opioids  
18 within the last year of life, timing of last chemotherapy treatment, and emergency hospital  
19 admission up to 4 weeks before death. We chose these because a reduction in hospital use  
20 at the end of life is commonly used as a proxy for better quality care.<sup>3,5,11-15</sup> Recently we  
21 have demonstrated the relatively late onset of strong opioid prescribing before death in a  
22 cohort of cancer patients.<sup>16</sup> We judged that given the prevalence of pain in advanced cancer  
23 access to strong opioids could also be a proxy for better quality care.  
24  
25  
26  
27  
28  
29

30 Place of death was categorised as own home, hospice, hospital, care home, other or  
31 unknown. Patients with at least one strong opioid prescription were coded as yes, patients  
32 with prescriptions other than a strong opioid within the last year were coded as no. The list  
33 of strong opioids included are provided in appendix 1. Patients without a prescription were  
34 coded as missing. The timing of chemotherapy was categorised into either no  
35 chemotherapy, chemotherapy 0–4 weeks before death, or chemotherapy over 4 weeks  
36 before death. The number of emergency admissions to hospital in last 4 weeks of life were  
37 grouped into avoided emergency admission or did not avoid emergency admission (one or  
38 more emergency admissions).  
39  
40  
41  
42  
43  
44  
45

### 46 **Covariates**

47  
48 Covariates considered were age, categorised into younger than 50 years, older than 80  
49 years, and deciles in between; sex (male or female); Indices of Multiple Deprivation (IMD)  
50 quintile (where 1 = most deprived and 5 = least deprived); cancer diagnosis; and duration of  
51 illness (in years) before death.  
52  
53  
54  
55

### 56 **Statistical analysis**

57  
58 7  
59  
60

1  
2  
3 We used Pearson's chi-square ( $\chi^2$ ) to test associations between receiving palliative care and  
4 end of life quality outcomes. Post-hoc  $\chi^2$  tests were conducted for each possible 2 by 2 table  
5 comparison, adjusted using the Bonferroni correction, where outcomes included more than  
6 two categories and the  $\chi^2$  resulted in a p value of less than 0.05. The association between  
7 duration of palliative care and number of palliative care events was explored through  
8 frequency tables and the Spearman's rank correlation coefficient. Differences in median  
9 scores were compared using the Mann-Whitney U test, for two group comparisons, or the  
10 Kruskal-Wallis H test, for more than two groups. Where statistically significant results were  
11 identified from the Kruskal-Wallis H test Dunn–Bonferroni post-hoc tests for multiple  
12 comparisons of rank sums, based on the z-statistics, were conducted for each possible  
13 combination of two group comparisons.<sup>17</sup>

14  
15 We constructed a classification tree for each end of life care outcome, using chi-squared  
16 automatic interaction detection (CHAID), to identify, for each outcome, the optimum cut-off  
17 points for duration of palliative care.<sup>18</sup> Each CHAID classification tree included palliative care  
18 duration as the only predictor variable. Nodes associated with the first branch of the  
19 dendrogram identified the optimum duration of palliative care cut-off points. Where the  
20 cut-off point was 0 weeks palliative care, this reflected contact with palliative care but  
21 within 7 days of death. Multivariable regression models (logistic and multinomial) were used  
22 to investigate the role of these cut-off points on end of life care outcomes, after controlling  
23 for age at death, gender, IMD deprivation quintile, first diagnosis cancer site and duration of  
24 illness. Results are presented as odds ratios (ORs) alongside 95% confidence intervals (95%  
25 CI).

26  
27 Complete case analysis was undertaken. P values less than 0.05 were considered statistically  
28 significant (2-tailed). Analysis was conducted using IBM SPSS statistics version 23.

### 29 30 31 **Public involvement**

32  
33 Patients were involved in setting the research question and in the design of the study, no  
34 patients were asked to advise on interpretation or writing up of results. The results of the  
35 research have been disseminated to the patient community through patient forums.

## 36 37 **Results**

### 38 39 **Patient characteristics**

40  
41  
42  
43  
44  
45  
46  
47  
48  
49  
50  
51  
52  
53  
54  
55  
56  
57  
58 8

1  
2  
3 Of the 2479 patients included in the study 64.5% (n=1598) received at least one palliative  
4 care event. Community based palliative care was received by 45.3% (n=1124), and hospital  
5 based palliative care was received by 40.0% (n=991), of patients.  
6  
7

8 Table 1 shows age ( $p<0.001$ ), sex ( $p=0.006$ ), and cancer diagnosis ( $p=0.004$ ) were  
9 significantly associated with receiving palliative care. Palliative care was more likely to be  
10 received by patients who were younger or female. As a proportion of all patients within  
11 each cancer site, patients with upper gastrointestinal cancers were significantly more likely  
12 to receive palliative care while patients with lung cancer or cancers of the central nervous  
13 system were significantly less likely to receive palliative care.  
14  
15  
16  
17  
18

19 (Insert Table 1 here)  
20  
21

22 The duration of palliative care provided to patients varied widely from less than one week to  
23 343 weeks, with a median duration of 6 weeks (interquartile range 2 to 19 weeks). Most  
24 patients who received palliative care received between one and three palliative care events  
25 (median 2 events, interquartile range 1 to 3 events). There was a significant positive  
26 relationship between the duration of palliative care and number of palliative care events  
27 ( $r_s=0.535$ ,  $p<0.001$ ).  
28  
29  
30  
31  
32

### 33 **Place of death**

34 Place of death was significantly associated with palliative care provision ( $p<0.001$ ). Post-hoc  
35 tests showed that patients who received palliative care were significantly more likely to die  
36 in a hospice (39.4% versus 14.5%,  $p<0.05$ ) and significantly less likely to die in hospital  
37 (23.3% versus 40.1%,  $p<0.05$ ), at home (26.8% versus 31.8%,  $p<0.05$ ), or in a care home  
38 (8.7% versus 12.0%,  $p<0.05$ ) compared to patients who did not receive palliative care (Table  
39 2).  
40  
41  
42  
43  
44  
45

46 For the 1598 patients who received palliative care, a shorter duration of palliative care was  
47 observed for hospital deaths (median 3 weeks palliative care) compared with deaths in  
48 hospice (median 7 week palliative cares), at home (median 7 weeks palliative care) or in a  
49 care home (median 13 weeks palliative care) ( $p<0.001$ ). There was also a significant  
50 difference in the number of palliative care events by place of death ( $p<0.001$ ), with the  
51  
52  
53  
54  
55  
56  
57

1  
2  
3 median number of palliative events in hospital equalling one event, compared with a  
4 median of two events for deaths at home, in a hospice, or in a care home (Table 2).  
5  
6  
7

### 8 **Receiving at least one strong opioid prescription within the last year of life**

9

10 Patients who received palliative care were significantly more likely to have also been  
11 prescribed strong opioids before death compared with patients who did not receive  
12 palliative care (53.9% versus 25.2%,  $p<0.001$ ).  
13  
14

15  
16 For those patients that received palliative care ( $n=1598$ ), the median duration of palliative  
17 care and the number of palliative care events were significantly higher for patients who  
18 received at least one strong opioid prescription, Table 3.  
19  
20

21 (Insert table 3 here)  
22  
23

### 24 **Timing of last chemotherapy**

25

26  
27 A significant relationship was identified between timing of last chemotherapy and receiving  
28 palliative care ( $p<0.001$ ). Post-hoc analysis showed that patients who received palliative  
29 care were more likely to have been treated with chemotherapy at any point during the  
30 course of their disease (63.6% versus 47.4%  $P<0.05$ ) and were more likely to have stopped  
31 chemotherapy over four weeks before death, compared with patients not receiving  
32 palliative care (58.5% versus 42.1%,  $p<0.05$ ).  
33  
34  
35  
36

37 For patients who received palliative care ( $n=1598$ ) the duration of palliative care was  
38 significantly associated with the timing of latest chemotherapy, Table 4  
39  
40

41 (Insert table 4 here)  
42  
43

### 44 **Emergency hospital admission within the last four weeks of life**

45

46 The majority of the sample (1926 out of 2479, 77.7%) avoided emergency hospital  
47 admission in the last 4 weeks of life. A borderline significant association was identified  
48 between emergency hospital admissions in the last four weeks of life and receiving palliative  
49 care ( $p=0.049$ ). For patients who received palliative care ( $n=1598$ ), emergency admission  
50 was associated with a significantly shorter duration of palliative care (4 weeks versus 7  
51 weeks,  $p<0.001$ ) and significantly fewer palliative care events overall (2 events versus 2  
52 events,  $p=0.010$ ).  
53  
54  
55  
56  
57

58 10  
59  
60

(Insert table 5 here)

Multivariable regressionClassification tree optimum cut-off points for each of the end of life outcomes are provided in appendix 2. Between three and five optimum duration of palliative care cut-off points were identified for the four end of life outcomes. The multivariable (multinomial) logistic regression models, using optimum cut-off points for duration of palliative care, showed overall greater odds ratios for better outcomes at the end of life with longer duration of palliative care, Figure 1. Each cut-off point within in the model represents a significantly better outcome. For example, although overall there was no association between palliative care and increased home deaths, the model shows that patients who received 2-7 weeks of palliative care had 2.96 better odds of dying at home than in hospital, and those who received more than 8 weeks of palliative care had 3.49 better odds of dying at home. Similarly, there was a clear stepwise increase in the odds of receiving an opioid prescription with each increment of palliative care duration (0-3 weeks, 4-7 weeks, 8-32 weeks and 33+ weeks)

(Insert Fig 1 here)

## Discussion

Our analysis confirms existing research that better outcomes at the end of life are associated with access to palliative care services. However, we have been able to demonstrate for the first time that longer increments of palliative care are associated with increasingly better outcomes, specifically relating to place of death outside hospital, access to strong opioid, and avoiding chemotherapy and emergency hospital admission within the last 4 weeks of life. For some outcomes such as place of death at home, there appears to be a minimum duration of palliative care that is associated with higher odds of home death, suggesting that sufficient time is required to plan and co-ordinate in order to achieve this outcome for a patient. Although causality cannot be assumed, these findings provide additional evidence to support earlier integration of palliative care within oncology service delivery models.

1  
2  
3  
4  
5 We found patients who received palliative care were less likely to die in hospital and more  
6 likely to die in a hospice. Despite care being rated significantly lower for people who die in a  
7 hospital, compared to home, a hospice or care home<sup>20</sup> approximately 48% of UK cancer  
8 patients die in hospital.<sup>21</sup> We identified the level of palliative care involvement associated  
9 with a reduction in hospital deaths was minimal (two contacts initiated at least three  
10 weeks before death). The potential per patient saving by avoiding a hospital death proposed  
11 by the National End of Life Information Network is £958 per patient.<sup>22</sup>  
12  
13  
14  
15  
16

17 Evidence for the impact of palliative care on home death is inconsistent. We found the rate  
18 of home deaths in patients who received palliative care was lower compared to those who  
19 did not, however the likelihood of dying at home, rather than hospital, increased as the  
20 intensity of palliative care involvement increased. A meta-analysis found palliative care had  
21 no impact on home deaths<sup>23</sup> while a Cochrane review undertaken the same year found it  
22 more than doubles the odds of dying at home.<sup>24</sup> These differences may reflect differences in  
23 the availability of hospice or palliative care services, or bias in the selection of patients  
24 suitable for palliative care. Our data suggest that duration of palliative care may account for  
25 this inconsistent relationship.  
26  
27  
28  
29  
30  
31  
32

33 Opioid analgesia is the recommended treatment for moderate to severe pain<sup>25</sup> the  
34 prevalence of which in advanced cancer is estimated to be between 62% and 86%.<sup>26</sup> We  
35 found access to palliative care was associated with being twice as likely to have access to  
36 strong opioids however the direction of the relationship was unclear.  
37  
38  
39  
40

41 Administration of chemotherapy close to death usually represents poorly planned care.<sup>27</sup> It  
42 was encouraging to find that only 5% of our study population received chemotherapy within  
43 the last four weeks of life however this limited the potential to explore the impact of  
44 palliative care on late chemotherapy. Studies that have established an association between  
45 palliative care team involvement and lower rates of chemotherapy near the end of life have  
46 concluded that cessation of chemotherapy is due to palliative care involvement.<sup>28</sup> Although  
47 a referral to palliative care may help protect against late chemotherapy, our findings suggest  
48 this association is more complex and in some cases receiving chemotherapy or the cessation  
49 of chemotherapy may in fact drive the palliative care referral.  
50  
51  
52  
53  
54  
55  
56  
57

1  
2  
3 We hypothesised that patients who received palliative care would be more likely to avoid  
4 emergency hospital admissions in the last four weeks of life though we found the opposite.  
5  
6 Further analysis revealed that only patients who received palliative care for longer than four  
7  
8 weeks benefited in this outcome. Patients receiving under four weeks of palliative care were  
9  
10 more likely to require emergency admission within the last four weeks of life. This might be  
11 explained by emergency hospital admission triggering palliative care involvement. Current  
12 evidence reports that 77% of emergency cancer admissions are avoidable<sup>29</sup> so our findings  
13 indicate there is considerable scope to reduce emergency admissions through a relatively  
14 short duration of palliative care.  
15  
16  
17

18  
19 This study has limitations. First, the population is derived from a single UK city. Though  
20 broadly representative of the UK cancer population in prevalence of cancer type, age, sex,  
21 and survival, the extent to which access to palliative care is representative of national and  
22 international activity is harder to determine. Secondly, the data are derived from a live  
23 clinical system and as such are likely to represent errors or omissions inherent within the  
24 system. Thirdly, we cannot assume that access to or longer duration of palliative care  
25 caused better outcomes. For some outcomes and for some patients, such as access to  
26 strong opioids or cessation of chemotherapy, it is possible that the outcome event itself  
27 triggered referral to palliative care. These are nevertheless important hypotheses to test  
28 further in terms of operationalising earlier integration of palliative care. In contrast, deaths  
29 outside hospital and increased home death appear more likely to be the result of longer  
30 duration of palliative care.  
31  
32  
33  
34  
35  
36  
37  
38  
39  
40  
41  
42

## 43 **Conclusion**

44  
45 The research evidence to support early integration of palliative care for cancer patients<sup>1-6</sup> is  
46 based on relatively high intensity interventions of at least 8–12 weeks initiated  
47 approximately 6–14 months before death. Within routinely collected data, we have  
48 determined an association between duration of palliative care and important quality  
49 indicators of end of life care. Receiving two or more weeks of palliative care was associated  
50 with avoiding a hospital death. At least four weeks of palliative care was associated with a  
51 reduction in emergency hospital admissions and an increased likelihood of receiving an  
52  
53  
54  
55  
56  
57

1  
2  
3 opioid analgesic. More than 32 weeks palliative care was associated with a reduction in  
4  
5 Characterising palliative care services based on duration of care provides new evidence  
6  
7 which will aid policymakers when modelling palliative care service provision. Evidence of  
8  
9 benefit in advanced non-cancer diseases remains unclear but together with other  
10  
11 observational evidence, our findings should stimulate similar research in these populations.  
12  
13  
14  
15  
16  
17  
18  
19  
20  
21  
22  
23  
24  
25  
26  
27  
28  
29  
30  
31  
32  
33  
34  
35  
36  
37  
38  
39  
40  
41  
42  
43  
44  
45  
46  
47  
48  
49  
50  
51  
52  
53  
54  
55  
56  
57

For peer review only



## Contributors

Conception and design: Lucy E Ziegler, Robert M West, Geoff Hall, Paul Carder, Adam Hurlow, Pablo Millares-Martin, Michael I Bennett

Collection and assembly of data: Lucy E Ziegler, Cheryl L Craigs

Data analysis and interpretation: Lucy E Ziegler, Cheryl L Craigs, Robert M West, Michael I Bennett

Manuscript writing: All authors

Final approval of manuscript: All authors

Accountable for all aspects of the work: All authors

## Funding

This study was funded by the National Institute for Health Research and Yorkshire Cancer Research and (Award reference numbers 13/TH/0301). The views expressed in this report are those of the authors and do not necessarily represent those of the National Health Service (NHS), Department of Health, or Yorkshire Cancer Research. The funders had no role in the study design, data collection, data analysis, data interpretation, or writing of the report.

## Competing interests

We have read and understood BMJ policy on declaration of interests and declare that we have no competing interests.

## Ethical approval

The National Research Ethics Service (PR 13.YH.0301) granted ethical approval for the study.

## Acknowledgements

The authors would like to acknowledge the key role of Professor Rick Jones who advised on the data linkage process for this study, and Chris Jackson for his role in constructing the searches and accessing the data.

## Data Sharing

No additional data available. Electronic health records are considered “sensitive” data in the UK by the Data Protection Act and cannot be shared via public deposition due to restrictions in place to protect patient confidentiality.

## Transparency statement

The lead author affirms that the manuscript is an honest, accurate, and transparent account of the study being reported; that no important aspects of the study have been omitted; and that any discrepancies are disclosed.

## References

1. Smith TJ, Temin S, Alesi ER, et al: American Society of Clinical Oncology provisional clinical opinion: the integration of palliative care into standard oncology care. *J Clin Oncol* 30:880-7, 2012
2. Rugno FC, Paiva BS, Paiva CE: Early integration of palliative care facilitates the discontinuation of anticancer treatment in women with advanced breast or gynecologic cancers. *Gynecol Oncol* 135:249-54, 2014
3. Bakitas MA, Tosteson TD, Li Z, et al: Early Versus Delayed Initiation of Concurrent Palliative Oncology Care: Patient Outcomes in the ENABLE III Randomized Controlled Trial. *J Clin Oncol* 33:1438-45, 2015
4. Greer JA, Jackson VA, Meier DE, et al: Early integration of palliative care services with standard oncology care for patients with advanced cancer. *CA Cancer J Clin* 63:349-63, 2013
5. Temel JS, Greer JA, Muzikansky A, et al: Early palliative care for patients with metastatic non-small-cell lung cancer. *N Engl J Med* 363:733-42, 2010
6. Zimmermann C, Swami N, Krzyzanowska M, et al: Early palliative care for patients with advanced cancer: a cluster-randomised controlled trial. *Lancet* 383:1721-30, 2014
7. Osta BE, Palmer JL, Paraskevopoulos T, et al: Interval between first palliative care consult and death in patients diagnosed with advanced cancer at a comprehensive cancer center. *J Palliat Med* 11:51-7, 2008
8. Bennett MI, Ziegler L, Allsop M, et al: What determines duration of palliative care before death for patients with advanced disease? A retrospective cohort study of community and hospital palliative care provision in a large UK city. *BMJ Open* Accepted November 2016, 2016
9. Henson L, Gao W, Higginson I, et al: Emergency department attendance by patients with cancer in the last month of life: a systematic review and meta-analysis. *Lancet* 385 Suppl 1:S41, 2015

1  
2  
3 10. Seow H, Brazil K, Sussman J, et al: Impact of community based, specialist  
4 palliative care teams on hospitalisations and emergency department visits late in life and  
5 hospital deaths: a pooled analysis. *Bmj* 348:g3496, 2014  
6  
7

8 11. Blackhall LJ, Read P, Stukenborg G, et al: CARE Track for Advanced Cancer:  
9 Impact and Timing of an Outpatient Palliative Care Clinic. *J Palliat Med* 19:57-63, 2016  
10  
11

12 12. Bharadwaj P, Helfen KM, Deleon LJ, et al: Making the Case for Palliative Care  
13 at the System Level: Outcomes Data. *J Palliat Med* 19:255-8, 2016  
14  
15

16 13. National Council of Palliative Care: Commissioning Guidance for Specialist  
17 Palliative Care: Helping to deliver commissioning objectives, December 2012, Guidance  
18 document published collaboratively with the association for Palliative Medicine of Great  
19 Britain and Ireland, Consultant nurse in palliative care reference group, Marie Curie Cancer  
20 Care, National Council for palliative Care and Palliative care Section of the Royal Society of  
21 Medicine. London UK, 2012  
22  
23  
24  
25

26 14. Department of Health: End of Life Care Strategy – promoting high quality care  
27 for all adults at the end of life. London Central Office of Information, Crown, 2008  
28  
29

30 15. National Institute for Health and Care Excellence: Quality Standard for end of  
31 life care for adults, End of life care (ed Issued August 2011 last modified October 2013).  
32 London, UK, 2011  
33  
34  
35

36 16. Ziegler L, Mulvey M, Blenkinsopp A, et al: Opioid prescribing for patients with  
37 cancer in the last year of life: a longitudinal population cohort study. *Pain* 157:2445-2451,  
38 2016  
39  
40

41 17. Dunn OJ: Multiple comparisons using rank sums. *Technometrics* 6:241-252,  
42 1964  
43  
44

45 18. Copolov D, Singh B: Constructing a minimal diagnostic decision tree. *Meth*  
46 *Inform Med* 32:161-6, 1993  
47  
48

49 19. National Institute of Clinical Excellence: Safe and Effective Prescribing of  
50 Strong opioids in palliative care of adults. . London, Uk National Institute of Clinical  
51 Excellence,, 2011  
52  
53  
54

1  
2  
3                   20.     Office for National Statistics: Statistical Bulletin: National Survey of Bereaved  
4 People (VOICES): England 2015, ONS, 2016  
5

6                   21.     Gao W, Ho YK, Verne J, et al: Changing patterns in place of cancer death in  
7 England: a population-based study. PLoS Med 10:e1001410, 2013  
8  
9

10                   22.     Dixon J, King D, Matosevic T, et al: Equity in the Provision of Palliative Care in  
11 the UK; review of Evidence   PSSRU Discussion Paper 2894. London London School of  
12 Economics 2015  
13  
14

15                   23.     Lockett T, Davidson PM, Lam L, et al: Do community specialist palliative care  
16 services that provide home nursing increase rates of home death for people with life-  
17 limiting illnesses? A systematic review and meta-analysis of comparative studies. J Pain  
18 Symptom Manage 45:279-97, 2013  
19  
20  
21

22                   24.     Gomes B, Calanzani N, Curiale V, et al: Effectiveness and cost-effectiveness of  
23 home palliative care services for adults with advanced illness and their caregivers. Cochrane  
24 Database Syst Rev:Cd007760, 2013  
25  
26  
27

28                   25.     National Institute for Health and Clinical Excellence: Safe and Effective  
29 Prescribing of Strong Opioids for Pain in Palliative Care of Adults, Opioids in Palliative Care:  
30 NICE Clinical guideline No.140 Cardiff (UK), National Collaborating Centre for Cancer, 2012  
31  
32  
33

34                   26.     van den Beuken-van Everdingen MH, de Rijke JM, Kessels AG, et al:  
35 Prevalence of pain in patients with cancer: a systematic review of the past 40 years. Ann  
36 Oncol 18:1437-49, 2007  
37  
38  
39

40                   27.     Pirl WF, Greer JA, Irwin K, et al: Processes of discontinuing chemotherapy for  
41 metastatic non-small-cell lung cancer at the end of life. J Oncol Pract 11:e405-12, 2015  
42  
43

44                   28.     Karim SM, Zekri J, Abdelghany E, et al: Time from last chemotherapy to death  
45 and its correlation with the end of life care in a referral hospital. Indian J Med Paediatr  
46 Oncol 36:55-9, 2015  
47  
48  
49

50                   29.     Delgado-Guay MO, Kim YJ, Shin SH, et al: Avoidable and unavoidable visits to  
51 the emergency department among patients with advanced cancer receiving outpatient  
52 palliative care. J Pain Symptom Manage 49:497-504, 2015  
53  
54  
55

1  
2  
3  
4  
5  
6  
7  
8  
9  
10  
11  
12  
13  
14  
15  
16  
17  
18  
19  
20  
21  
22  
23  
24  
25  
26  
27  
28  
29  
30  
31  
32  
33  
34  
35  
36  
37  
38  
39  
40  
41  
42  
43  
44  
45  
46  
47  
48  
49  
50  
51  
52  
53  
54  
55  
56  
57  
58  
59  
60

For peer review only

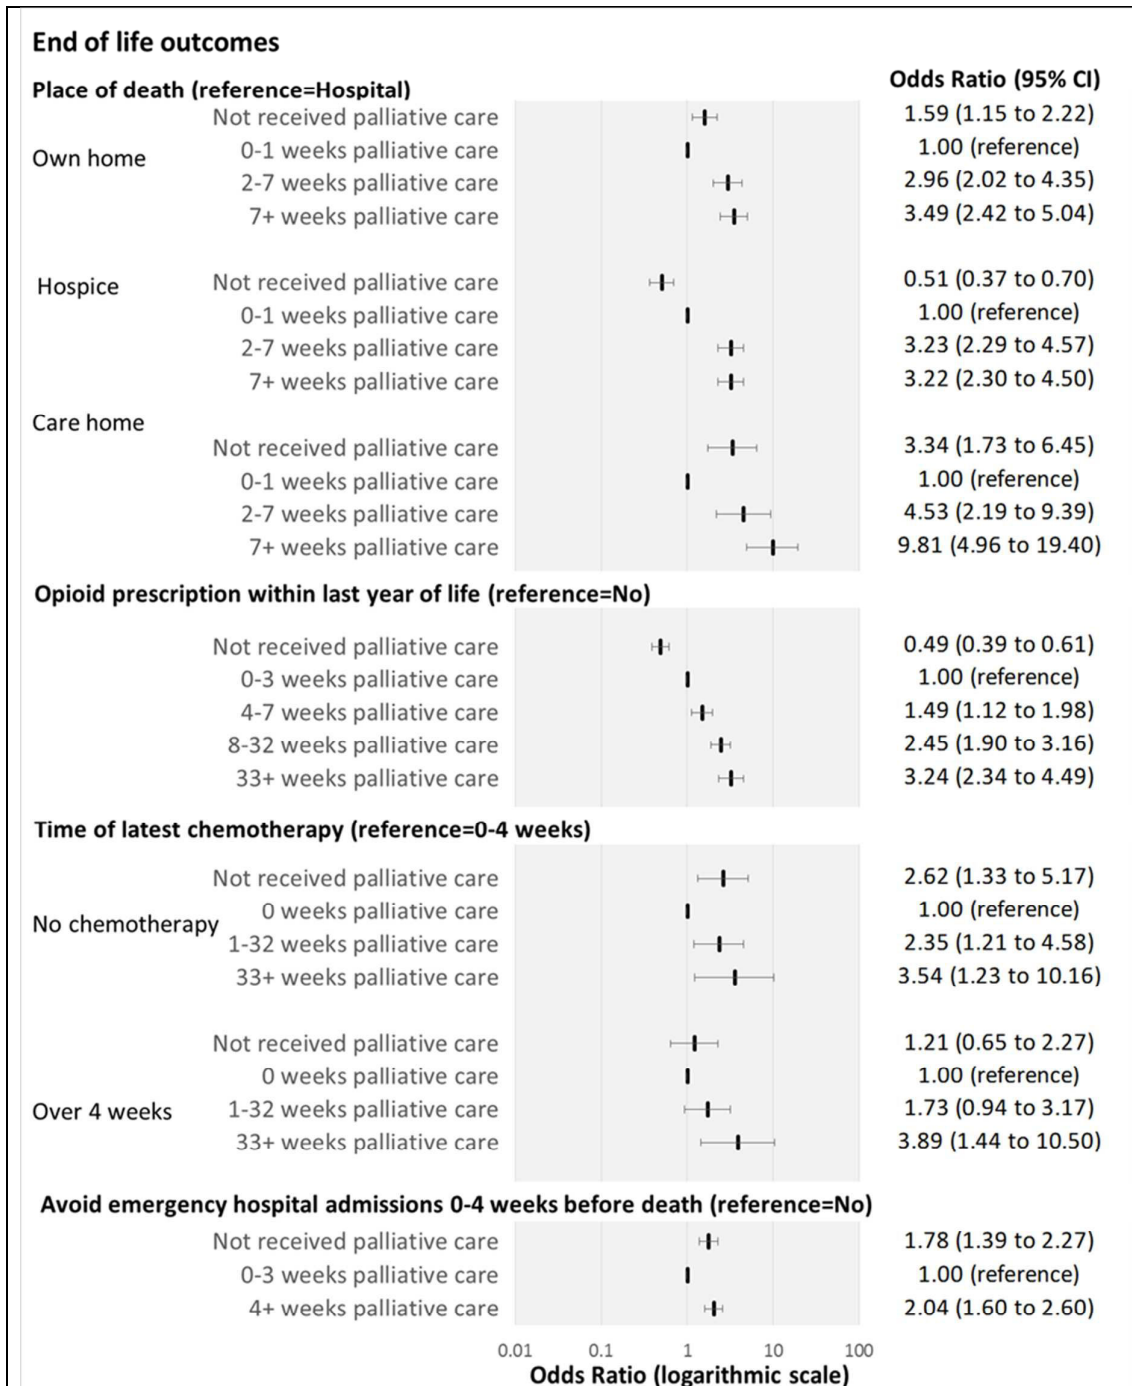

Confounding factors controlled for within the model: age at death, gender, IMD deprivation quintile, first diagnosis cancer site and duration of illness; CI: confidence intervals

**Fig 1| Multivariable adjusted odds ratios from logistic and multinomial logistic regression models for end of life outcomes by duration of palliative care cut-off points**

**Table 1 | Characteristics of the study population by palliative care provision**

| Characteristics                                                                                                          | Palliative care provision (n = 2479) |                                | Post-hoc |
|--------------------------------------------------------------------------------------------------------------------------|--------------------------------------|--------------------------------|----------|
|                                                                                                                          | Not received                         | Received                       |          |
| Total number of patients: No. Row %                                                                                      | 881 (35.5%)                          | 1598 (64.5%)                   |          |
| Age at death (years): No. Column %                                                                                       |                                      |                                |          |
| <50                                                                                                                      | 35 (4.0%)                            | 97 (6.1%)                      | <0.05    |
| 50-59                                                                                                                    | 65 (7.4%)                            | 184 (11.5%)                    | <0.05    |
| 60-69                                                                                                                    | 172 (19.5%)                          | 394 (24.7%)                    | <0.05    |
| 70-79                                                                                                                    | 289 (32.8%)                          | 514 (32.2%)                    | n/s      |
| 80+                                                                                                                      | 320 (36.3%)                          | 409 (25.6%)                    | <0.05    |
| <i>Statistical test</i>                                                                                                  |                                      | ( $\chi^2(4)=43.22, p<0.001$ ) |          |
| Gender: No. Column %                                                                                                     |                                      |                                |          |
| Male                                                                                                                     | 499 (56.6%)                          | 813 (50.9%)                    | n/a      |
| Female                                                                                                                   | 382 (43.4%)                          | 785 (49.1%)                    | n/a      |
| <i>Statistical test</i>                                                                                                  |                                      | ( $\chi^2(1)=7.57, p=0.006$ )  |          |
| IMD deprivation quintile: No. Column %                                                                                   |                                      |                                |          |
| Quintile 1 - Top 20% most deprived                                                                                       | 272 (30.9%)                          | 502 (31.4%)                    | n/a      |
| Quintile 2                                                                                                               | 166 (18.8%)                          | 315 (19.7%)                    | n/a      |
| Quintile 3                                                                                                               | 142 (16.1%)                          | 252 (15.8%)                    | n/a      |
| Quintile 4                                                                                                               | 182 (20.7%)                          | 317 (19.8%)                    | n/a      |
| Quintile 5 - Top 20% least deprived                                                                                      | 119 (13.5%)                          | 211 (13.2%)                    | n/a      |
| Missing                                                                                                                  | 0 (0.0%)                             | 1 (0.1%)                       | n/a      |
| <i>Statistical test</i>                                                                                                  |                                      | ( $\chi^2(4)=0.55, p=0.969$ )  |          |
| First diagnosis cancer site: No. Column %                                                                                |                                      |                                |          |
| Head and neck                                                                                                            | 42 (4.8%)                            | 69 (4.3%)                      | n/s      |
| Upper gastrointestinal                                                                                                   | 110 (12.5%)                          | 277 (17.3%)                    | <0.05    |
| Colorectal                                                                                                               | 113 (12.8%)                          | 214 (13.4%)                    | n/s      |
| Lung                                                                                                                     | 266 (30.2%)                          | 390 (24.4%)                    | <0.05    |
| Breast                                                                                                                   | 81 (9.2%)                            | 154 (9.6%)                     | n/s      |
| Gynaecological                                                                                                           | 44 (5.0%)                            | 107 (6.7%)                     | n/s      |
| Prostate                                                                                                                 | 83 (9.4%)                            | 149 (9.3%)                     | n/s      |
| Urological                                                                                                               | 66 (7.5%)                            | 125 (7.8%)                     | n/s      |
| Central nervous system                                                                                                   | 31 (3.5%)                            | 32 (2.0%)                      | <0.05    |
| All other cancer sites                                                                                                   | 45 (5.1%)                            | 81 (5.1%)                      | n/s      |
| <i>Statistical test</i>                                                                                                  |                                      | ( $\chi^2(9)=24.18, p=0.004$ ) |          |
| Duration of illness (years)                                                                                              |                                      |                                |          |
| Median                                                                                                                   | 1.28                                 | 1.26                           |          |
| IQR                                                                                                                      | (0.48-3.03)                          | (0.52-3.20)                    |          |
| <i>Statistical test</i>                                                                                                  |                                      | ( $M-W=701396, p=0.882$ )      |          |
| $\chi^2$ =Chi-square (degrees of freedom shown in brackets); M-W=Mann-Whitney U test;                                    |                                      |                                |          |
| IQR=Interquartile range; n/a=not applicable ( $\chi^2$ not significant overall or two by two table); n/s=not significant |                                      |                                |          |



**Table 2 | Palliative care provision by place of death**

| Place of death   | Palliative care provision (n=2479) |             |          | Sub-group receiving palliative care (n = 1598) |          |                                                  |          |
|------------------|------------------------------------|-------------|----------|------------------------------------------------|----------|--------------------------------------------------|----------|
|                  | Not received                       | Received    | Post-hoc | Number of palliative events                    |          | Duration of palliative care (weeks before death) |          |
|                  | Number (%)                         | Number (%)  |          | Median (IQR)                                   | Post-hoc | Median (IQR)                                     | Post-hoc |
| Own home         | 280 (31.8)                         | 429 (26.8%) | <0.05    | 2 events (1,3)                                 | i        | 7 weeks (2.5,17)                                 | i,ii     |
| Hospice          | 128 (14.5)                         | 629 (39.4%) | <0.05    | 2 events (1,3)                                 | ii       | 7 weeks (3,19)                                   | iii,iv   |
| Hospital         | 353 (40.1)                         | 372 (23.3%) | <0.05    | 1 event (1,2)                                  | i,ii,iii | 3 weeks (1,14)                                   | i,iii,v  |
| Care home        | 106 (12.0)                         | 139 (8.7%)  | <0.05    | 2 events (1,3)                                 | iii      | 13 weeks (4,35)                                  | ii,iv,v  |
| Other            | 1 (0.1)                            | 0 (0.0%)    | -        | -                                              | -        | -                                                | -        |
| Unknown          | 13 (1.5)                           | 29 (1.8%)   | -        | -                                              | -        | -                                                | -        |
| Statistical test | $(\chi^2(3)=180.52, p<0.001)$      |             |          | $(K-W(3)=128.14, p<0.001)$                     |          | $(K-W(3)=75.77, p<0.001)$                        |          |

$\chi^2$ =Chi-squared (degrees of freedom shown in brackets); K-W = Kruskal-Wallis H test (degrees of freedom shown in brackets); Post-hoc = multiple comparison z-test statistics comparing mean ranks for each possible two category comparison group; i,ii,iii,iv,v links categories where post-hoc comparison groups which resulted in a p value less than 0.05 (after adjusting using the Bonferroni correction); IQR=Interquartile range

**Table 3 | Palliative care provision by strong opioid prescription within the last twelve months of life**

| Strong opioid prescription within last year of life | Palliative care provision (n=2479) |                        | Sub-group receiving palliative care (n = 1598) |                                                                  |
|-----------------------------------------------------|------------------------------------|------------------------|------------------------------------------------|------------------------------------------------------------------|
|                                                     | Not received<br>Number (%)         | Received<br>Number (%) | Number of palliative events<br>Median (IQR)    | Duration of palliative care (weeks before death)<br>Median (IQR) |
| Yes                                                 | 222 (25.2%)                        | 862 (53.9%)            | 2 events (1,4)                                 | 9 weeks (3,26)                                                   |
| No                                                  | 655 (74.3%)                        | 736 (46.1%)            | 1 events (1,2)                                 | 4 weeks (1,12)                                                   |
| Missing                                             | 4 (0.5%)                           | 0 (0.0%)               |                                                |                                                                  |
| Statistical test                                    | $(\chi^2(1)=188.54, p<0.001)$      |                        | $(M-W=226447, <0.001)$                         | $(M-W=233259, p<0.001)$                                          |

$\chi^2$ =Chi-squared (degrees of freedom shown in brackets); M-W = Mann-Whitney U test; IQR=Interquartile range

**Table 4 | Palliative care provision by timing of latest chemotherapy**

| Time of latest chemotherapy | Palliative care provision (n=2479) |                              |          | Sub-group receiving palliative care (n = 1598) |          |                                                  |          |
|-----------------------------|------------------------------------|------------------------------|----------|------------------------------------------------|----------|--------------------------------------------------|----------|
|                             | Not received                       | Received                     | Post-hoc | Number of palliative events                    |          | Duration of palliative care (weeks before death) |          |
|                             |                                    |                              |          | Median (IQR)                                   | Post-hoc | Median (IQR)                                     | Post-hoc |
| No chemotherapy             | 463 (52.6%)                        | 582 (36.4%)                  | <0.05    | 2 events (1,3)                                 | i        | 5 weeks (2,14)                                   | i,ii     |
| 0-4 weeks                   | 47 (5.3%)                          | 82 (5.1%)                    | n/s      | 1 events (1,2)                                 | i,ii     | 2 weeks (1,6)                                    | i,iii    |
| Over 4 weeks                | 371 (42.1%)                        | 934 (58.5%)                  | <0.05    | 2 events (1,3)                                 | ii       | 8 weeks (2,22)                                   | ii,iii   |
| <i>Statistical test</i>     |                                    | $(\chi^2(2)=63.90, p<0.001)$ |          | $(K-W(2)=19.94, p<0.001)$                      |          | $(K-W(2)=46.58, p<0.001)$                        |          |

$\chi^2$ =Chi-squared (degrees of freedom shown in brackets); K-W = Kruskal-Wallis H test (degrees of freedom shown in brackets); Post-hoc = multiple comparison z-test statistics comparing mean ranks for each possible two category comparison group; i,ii,iii,iv,v links categories where post-hoc comparison groups which resulted in a p value less than 0.05 (after adjusting using the Bonferroni correction); IQR=Interquartile range; n/s=Not significant

**Table 5 | Palliative care provision by emergency hospital admissions within the last four weeks of life**

| Avoided emergency hospital admissions 0-4 weeks before death | Palliative care provision (n=2479) |                        | Sub-group receiving palliative care (n = 1598) |                                                                  |
|--------------------------------------------------------------|------------------------------------|------------------------|------------------------------------------------|------------------------------------------------------------------|
|                                                              | Not received<br>Number (%)         | Received<br>Number (%) | Number of palliative events<br>Median (IQR)    | Duration of palliative care (weeks before death)<br>Median (IQR) |
| Yes                                                          | 704 (79.9%)                        | 1222 (76.5%)           | 2 events (1,3)                                 | 7 weeks (2,20)                                                   |
| No (one or more admission)                                   | 177 (20.1%)                        | 376 (23.5%)            | 2 events (1,3)                                 | 4 weeks (1,12)                                                   |
| <i>Statistical test</i>                                      | $(\chi^2(1) = 3.87, p=0.049)$      |                        | $(M-W=210485, p=0.010)$                        | $(M-W=185814, p<0.001)$                                          |

$\chi^2$ =Chi-squared (degrees of freedom shown in brackets); M-W = Mann-Whitney U test; IQR=Interquartile range

**Appendix 1. Medications identified as strong opioids**

- Buprenorphine (>10mcg)
- Diamorphine
- Dipipanone (with cyclizine)
- Fentanyl
- Hydromorphone
- Meptazinol
- Morphine
- Oxycodone
- Pentazocine
- Papaveretum
- Pethidine

## Appendix 2: Classification tree duration of palliative care cut-off points by end of life quality outcomes

### Place of death

|                              | Cut-off points (n=2436): number (column %) |                    |                    |                    | Total                         |
|------------------------------|--------------------------------------------|--------------------|--------------------|--------------------|-------------------------------|
|                              | Not received                               | 0-1 weeks          | 2-7 weeks          | 8+ weeks           |                               |
| Own home                     | 280 (32.3%)                                | 70 (21.1%)         | 148 (28.1%)        | 211 (29.7%)        | 709 (29.1%)                   |
| Hospice                      | 128 (14.8%)                                | 104 (31.4%)        | 237 (45.0%)        | 288 (40.5%)        | 757 (31.1%)                   |
| Hospital                     | 353 (40.7%)                                | 146 (44.1%)        | 105 (19.9%)        | 121 (17.0%)        | 725 (29.8%)                   |
| Care home                    | 106 (12.2%)                                | 11 (3.3%)          | 37 (7.0%)          | 91 (12.8%)         | 245 (10.1%)                   |
| <i>Statistical test</i>      |                                            |                    |                    |                    | $(\chi^2(9)=280.75, p<0.001)$ |
| <b>Total: Number (row %)</b> | <b>867 (35.6%)</b>                         | <b>331 (13.6%)</b> | <b>527 (21.6%)</b> | <b>711 (29.2%)</b> | <b>2436</b>                   |

### Opioid prescription within last year of life

|                              | Cut-off points (n=2475): number (column %) |                    |                    |                    |                    | Total                         |
|------------------------------|--------------------------------------------|--------------------|--------------------|--------------------|--------------------|-------------------------------|
|                              | Not received                               | 0-3 weeks          | 4-7 weeks          | 8-32 weeks         | 33+ weeks          |                               |
| Yes                          | 222 (25.3%)                                | 237 (41.3%)        | 149 (50.0%)        | 299 (62.8%)        | 177 (70.8%)        | 1084 (43.8%)                  |
| No                           | 655 (74.7%)                                | 337 (58.7%)        | 149 (50.0%)        | 177 (37.2%)        | 73 (29.2%)         | 1391 (56.2%)                  |
| <i>Statistical test</i>      |                                            |                    |                    |                    |                    | $(\chi^2(4)=279.01, p<0.001)$ |
| <b>Total: Number (row %)</b> | <b>877 (35.4%)</b>                         | <b>574 (23.2%)</b> | <b>298 (12.0%)</b> | <b>476 (19.2%)</b> | <b>250 (10.1%)</b> | <b>2475</b>                   |

### Time of latest chemotherapy

|                              | Cut-off points (n=2479): number (column %) |                   |                     |                    | Total                         |
|------------------------------|--------------------------------------------|-------------------|---------------------|--------------------|-------------------------------|
|                              | Not received                               | 0 weeks           | 1-32 weeks          | 33+ weeks          |                               |
| No chemotherapy              | 463 (52.6%)                                | 50 (30.7%)        | 466 (39.4%)         | 66 (26.4%)         | 1045 (42.2%)                  |
| 0-4 weeks                    | 47 (5.3%)                                  | 16 (9.8%)         | 60 (5.1%)           | 6 (2.4%)           | 129 (5.2%)                    |
| 5+ weeks                     | 371 (42.1%)                                | 97 (59.5%)        | 659 (55.6%)         | 178 (71.2%)        | 1305 (52.6%)                  |
| <i>Statistical test</i>      |                                            |                   |                     |                    | $(\chi^2(3)=55.494, p<0.001)$ |
| <b>Total: Number (row %)</b> | <b>881 (35.5%)</b>                         | <b>163 (6.6%)</b> | <b>1185 (47.8%)</b> | <b>250 (10.1%)</b> | <b>2479</b>                   |

### Avoided emergency hospital admissions 0-4 weeks before death

|                              | Cut-off points (n=2479): number (column %) |                    |                     | Total                         |
|------------------------------|--------------------------------------------|--------------------|---------------------|-------------------------------|
|                              | Not received                               | 0-3 weeks          | 4+ weeks            |                               |
| Yes                          | 704 (79.9%)                                | 392 (68.3%)        | 830 (81.1%)         | 1926 (77.7%)                  |
| No (one or more admission)   | 177 (20.1%)                                | 182 (31.7%)        | 194 (18.9%)         | 553 (22.3%)                   |
| <i>Statistical test</i>      |                                            |                    |                     | $(\chi^2(2)=36.390, p<0.001)$ |
| <b>Total: Number (row %)</b> | <b>881 (35.5%)</b>                         | <b>574 (23.2%)</b> | <b>1024 (41.3%)</b> | <b>2479</b>                   |

# BMJ Open

## Is palliative care support associated with better quality end of life care indicators for patients with advanced cancer? A retrospective cohort study

|                                 |                                                                                                                                                                                                                                                                                                                                                                                                                                                                                    |
|---------------------------------|------------------------------------------------------------------------------------------------------------------------------------------------------------------------------------------------------------------------------------------------------------------------------------------------------------------------------------------------------------------------------------------------------------------------------------------------------------------------------------|
| Journal:                        | <i>BMJ Open</i>                                                                                                                                                                                                                                                                                                                                                                                                                                                                    |
| Manuscript ID                   | bmjopen-2017-018284.R1                                                                                                                                                                                                                                                                                                                                                                                                                                                             |
| Article Type:                   | Research                                                                                                                                                                                                                                                                                                                                                                                                                                                                           |
| Date Submitted by the Author:   | 31-Oct-2017                                                                                                                                                                                                                                                                                                                                                                                                                                                                        |
| Complete List of Authors:       | Ziegler, Lucy; University of Leeds, Leeds Institute of Health Sciences<br>Craigs , Cheryl; University of Leeds, Leeds Institute of Health Sciences<br>West, Robert; University of Leeds, Biostatistics<br>Carder, Paul ; NHS Bradford and Districts CCGs<br>Hurlow, Adam; Leeds General Infirmary<br>Millares Martin, Pablo; Whitehall Surgery,<br>Hall, Geoff; St James's University Teaching Hospital,<br>Bennett, Mike; University of Leeds, Leeds Institute of Health Sciences |
| <b>Primary Subject Heading</b>: | Palliative care                                                                                                                                                                                                                                                                                                                                                                                                                                                                    |
| Secondary Subject Heading:      | Oncology                                                                                                                                                                                                                                                                                                                                                                                                                                                                           |
| Keywords:                       | PALLIATIVE CARE, ONCOLOGY, end of life care, transitions in cancer care                                                                                                                                                                                                                                                                                                                                                                                                            |
|                                 |                                                                                                                                                                                                                                                                                                                                                                                                                                                                                    |

SCHOLARONE™  
Manuscripts

Only

## Title

Is palliative care support associated with better quality end of life care indicators for patients with advanced cancer? A retrospective cohort study.

## Authors

Dr Lucy E Ziegler<sup>1</sup>, University Academic Fellow

Dr Cheryl L Craigs<sup>1</sup>, Senior Statistician

Prof Robert M West<sup>2</sup>, Professor of Biostatistics

Mr Paul Carder<sup>3</sup>, Head of Research

Dr Adam Hurlow<sup>4</sup>, Consultant in Palliative Medicine

Dr Pablo Millares-Martin<sup>5</sup>, End of Life Clinical Lead

Dr Geoff Hall<sup>4</sup>, Lead Clinician for Cancer Services

Prof Michael I Bennett<sup>1</sup>, Professor of Palliative Medicine

1. Academic Unit of Palliative Care, Leeds Institute of Health Sciences, University of Leeds, Worsley Building, Clarendon Way, Leeds, LS2 9NL, UK
2. Health Services Research, Leeds Institute of Health Sciences, University of Leeds, Worsley Building, Clarendon Way, Leeds, LS2 9NL, UK
3. NHS Bradford Districts Clinical Commissioning Group, Douglas Mill, Bowling Old Lane, Bradford, BD5 7JR, UK
4. Leeds General Infirmary, Great George St, Leeds, LS1 3EX, UK
5. Leeds West Clinical Commissioning Group, Suites B5-B9, Wira House, Wira Business Park, Leeds, LS16 6EB, UK

## Corresponding Author

Dr Lucy E Ziegler, [L.E.Ziegler@leeds.ac.uk](mailto:L.E.Ziegler@leeds.ac.uk), +44 (0) 113 343 7351

The Corresponding Author has the right to grant on behalf of all authors and does grant on behalf of all authors, a worldwide licence to the Publishers and its licensees in perpetuity, in



1  
2  
3 all forms, formats and media (whether known now or created in the future), to i) publish,  
4 reproduce, distribute, display and store the Contribution, ii) translate the Contribution into  
5 other languages, create adaptations, reprints, include within collections and create  
6 summaries, extracts and/or, abstracts of the Contribution, iii) create any other derivative  
7 work(s) based on the Contribution, iv) to exploit all subsidiary rights in the Contribution, v)  
8 the inclusion of electronic links from the Contribution to third party material where-ever it  
9 may be located; and, vi) licence any third party to do any or all of the above.  
10  
11  
12  
13  
14  
15  
16  
17  
18  
19  
20  
21  
22  
23  
24  
25  
26  
27  
28  
29  
30  
31  
32  
33  
34  
35  
36  
37  
38  
39  
40  
41  
42  
43  
44  
45  
46  
47  
48  
49  
50  
51  
52  
53  
54  
55  
56  
57

## Abstract

### Objectives

This study aimed to establish the association between timing and provision of palliative care and quality of end-of-life care indicators in a population of patients dying of cancer.

### Setting

This study uses linked cancer patient data from the National Cancer Registry, the electronic medical record system used in primary care (SystemOne) and the electronic medical record system used within a specialist regional cancer centre. The population resided in a single city in Northern England.

### Participants

Retrospective data from 2479 adult cancer decedents who died between January 2010 and February 2012, were registered with a primary care provider using the SystemOne electronic health record system, and cancer was certified as a cause of death, were included in the study.

### Results

Linkage yielded data on 2479 cancer decedents, with 64.5% who received at least one palliative care (PC) event. Decedents who received PC were significantly more likely to die in a hospice (39.4% versus 14.5%,  $p<0.005$ ) and less likely to die in hospital (23.3% versus 40.1%,  $p<0.05$ ), and were more likely to receive an opioid (53.9% versus 25.2%,  $p<0.001$ ). Palliative care initiated more than 2 weeks before death was associated with avoiding a hospital death. ( $\geq 2$  weeks,  $p<0.001$ ), more than four weeks before death was associated with avoiding emergency hospital admissions and increased access to an opioid ( $\geq 4$  weeks,  $p<0.001$ ), and more than 33 weeks before death was associated with avoiding late chemotherapy ( $\geq 33$  weeks. No chemotherapy  $p=0.019$ , Chemotherapy over 4 weeks  $p=0.007$ ) and

### Conclusion

For decedents with advanced cancer, access to palliative care and longer duration of palliative care were significantly associated with better end of life quality indicators.

## Strengths and limitations of this study

- To the best of our knowledge this is the first UK study to explore the associations between duration of palliative care and quality of end of life care in a large population of cancer decedents.
- The data used in this study are derived from a live clinical system and as such are likely to represent errors or omissions inherent within that system.
- The definition of good quality end of life care used in this study is informed by UK policy and guidance on end of life care provision. We recognise that what constitutes good quality care at the end of life can vary by individual and that the study does not capture individual preferences or circumstances.

## Introduction

Integration of palliative care alongside oncology management should be considered early in the course of illness for patients with metastatic cancer or high symptom burden, according to American Society of Clinical Oncology guidelines.<sup>1</sup> This recommendation is based on a number of randomised controlled trials, largely from North America, which found early palliative care was associated with improved quality of life and a reduction in acute hospital admissions and aggressive cancer treatments at the end of life.<sup>2-6</sup> Though there were inconsistencies across trials, in general common characteristics were an assessment and several follow up consultations by specialist palliative care teams over a period of 2–3 months, which occurred about 6–14 months before patients died.

Compared to patients recruited to these clinical trials, cancer patients in routine care are often referred to palliative care services much later in the course of their illness.<sup>7</sup> We recently showed that for 4650 cancer patients in Leeds, median contact was 34 days for community and hospital palliative care services.<sup>8</sup> The relatively short duration of palliative care in routine services might limit the opportunity for identification of needs and the subsequent provision of effective support and symptom management. This could adversely impact on end of life outcomes.

Systematic reviews and pooled analyses of routinely collected data have demonstrated an association between palliative care intervention and increased proportion of home deaths as well as reduction in emergency admissions.<sup>9,10</sup> However, no study has quantified these associations in relation to duration of palliative care. In order to more directly inform models of service delivery, better quality data is needed on how long patients with cancer need to receive palliative care before important improvements in end of life care can be observed.

We report a retrospective cohort study that linked routinely collected data on hospital and community healthcare resource use in cancer decedents.

We chose this study design because it enabled us to examine the effects of palliative care service delivery in routine care for a case series of cancer decedents and minimised recruitment bias from a clinical trial design. We wanted to test the hypothesis that contact

with and longer duration of palliative care would be associated with better end of life care quality indicators for patients with advanced cancer.

## Methods

### Study population

Retrospective data from 2479 adult (aged at least 18 years at death) cancer decedents who died between January 2010 and February 2012, resided within a single UK city, were registered with a primary care provider using the SystmOne electronic health record system, and cancer was certified as a cause of death, were included in the study.

### Data collection

Data was obtained from three sources, the Northern and Yorkshire Cancer Registry and Information Service (NYCRIS), SystmOne, and the Patient Pathway Manager (PPM). NYCRIS maintain a database of all cancers occurring in the Northern and Yorkshire region in England. SystemOne is an electronic health record system used by approximately 75% of primary care providers in Leeds. PPM is a clinical information system used at a regional specialist cancer centre to manage and coordinate patient care.

Decedents eligible for the study were identified from the NYCRIS database based on address, date of death, and cause of death. The NYCRIS database provided all demographic, diagnostic, and death information. SystmOne provided opioid prescription information and community palliative care provision. PPM provided chemotherapy treatment, emergency hospital admissions and hospital based palliative care referral information. The three data sources were linked using an open pseudonymiser system to create an encrypted code based on NHS numbers.

### Assessment of palliative care provision

The primary measure of palliative care provision used in this study was time between first contact with palliative care and death, measured as time in weeks. Both hospital and community based records of palliative care events were included.

The PPM system provided information on hospital based palliative care referrals. For each patient included in our study every unique palliative care referral date recorded on the PPM system was identified as a unique palliative care event. Community palliative care provision

1  
2  
3 was estimated using GP communications within SystemOne, based on a multistage approach.  
4 In the first stage any GP communication within SystemOne which included either a palliative  
5 care based READ code or included text indicating palliative care, based on a keyword search,  
6 was extracted from SystemOne as a list of records, with the possibility of multiple records  
7 per patient. In the second stage only records which extended up to the date of death and  
8 included either a READ code indicating the active provision of palliative care, identified  
9 through consensus between authors (see appendix 1), or included communication with a  
10 hospice, were identified as representing palliative care provision. For each patient every  
11 unique palliative care provision date recorded in SystemOne was identified as a unique  
12 palliative care event representing contact with a palliative care team member.  
13  
14  
15  
16  
17  
18  
19

20 The total number of palliative care events identified for each patient was a secondary  
21 measure of palliative care provision which was used as a proxy to indicate the extent of  
22 palliative care support provided.  
23  
24  
25

## 26 **Outcomes**

27  
28 The end of life quality indicators assessed were informed by UK policy and international  
29 research evidence on what constitutes quality end of life care provision for patients with  
30 cancer<sup>3,5,11-15</sup> and included place of death, access to strong opioids within the last year of life  
31 (identified if decedents received at least one opioid prescription within the last 12 months  
32 of life), timing of last chemotherapy treatment, and emergency hospital admission up to 4  
33 weeks before death. We chose these because a reduction in hospital use at the end of life is  
34 commonly used as a proxy for better quality care<sup>3,5,11-15</sup> Recently we have demonstrated the  
35 relatively late onset of strong opioid prescribing before death in a cohort of cancer  
36 patients.<sup>16</sup> We judged that given the prevalence of pain in advanced cancer access to strong  
37 opioids could also be a proxy for better quality care.  
38  
39  
40  
41  
42  
43  
44  
45

46 Place of death was categorised as own home, hospice, hospital, care home, other or  
47 unknown. Decedents with at least one strong opioid prescription were coded as yes, with  
48 prescriptions other than a strong opioid within the last year were coded as no. The list of  
49 strong opioids included are provided in appendix 2. Decedents without a prescription were  
50 coded as missing. The timing of chemotherapy was categorised into either no  
51 chemotherapy, chemotherapy 0–4 weeks before death, or chemotherapy over 4 weeks  
52 before death. The number of emergency admissions to hospital in last 4 weeks of life were  
53  
54  
55  
56  
57  
58  
59  
60

1  
2  
3 grouped into avoided emergency admission or did not avoid emergency admission (one or  
4 more emergency admissions).  
5

### 6 7 **Covariates**

8  
9 Covariates considered were age, categorised into younger than 50 years, older than 80  
10 years, and deciles in between; sex (male or female); Indices of Multiple Deprivation (IMD)  
11 quintile (where 1 = most deprived and 5 = least deprived); cancer diagnosis; and duration of  
12 illness (in years) before death.  
13  
14

### 15 16 **Statistical analysis**

17  
18 We used Pearson's chi-square ( $\chi^2$ ) to test associations between receiving palliative care and  
19 end of life quality outcomes. Post-hoc  $\chi^2$  tests were conducted for each possible 2 by 2 table  
20 comparison, adjusted using the Bonferroni correction, where outcomes included more than  
21 two categories and the  $\chi^2$  resulted in a p value of less than 0.05. The association between  
22 duration of palliative care and number of palliative care events was explored through  
23 frequency tables and the Spearman's rank correlation coefficient. Differences in median  
24 scores were compared using the Mann-Whitney U test, for two group comparisons, or the  
25 Kruskal-Wallis H test, for more than two groups. Where statistically significant results were  
26 identified from the Kruskal-Wallis H test Dunn–Bonferroni post-hoc tests for multiple  
27 comparisons of rank sums, based on the z-statistics, were conducted for each possible  
28 combination of two group comparisons.<sup>17</sup>  
29  
30  
31  
32  
33  
34  
35  
36  
37

38 We constructed a classification tree for each end of life care outcome, using chi-squared  
39 automatic interaction detection (CHAID), to identify, for each outcome, the optimum cut-off  
40 points for duration of palliative care.<sup>18</sup> Each CHAID classification tree included palliative care  
41 duration as the only predictor variable. Nodes associated with the first branch of the  
42 dendrogram identified the optimum duration of palliative care cut-off points. Where the  
43 cut-off point was 0 weeks palliative care, this reflected contact with palliative care but  
44 within 7 days of death. Multivariable regression models (logistic and multinomial) were used  
45 to investigate the role of these cut-off points on end of life care outcomes, after controlling  
46 for age at death, gender, IMD deprivation quintile, first diagnosis cancer site and duration of  
47 illness. Results are presented as odds ratios (ORs) alongside 95% confidence intervals (95%  
48 CI).  
49  
50  
51  
52  
53  
54  
55  
56  
57

Complete case analysis was undertaken. P values less than 0.05 were considered statistically significant (2-tailed). Analysis was conducted using IBM SPSS statistics version 23.

### Public involvement

Patients were involved in setting the research question and in the design of the study, no patients were asked for advice on interpretation or writing up of results. The results of the research have been disseminated to the patient community through patient forums.

## Results

### Patient characteristics

Of the 2479 patients included in the study 64.5% (n=1598) received at least one palliative care event. Community based palliative care was received by 45.3% (n=1124), and hospital based palliative care was received by 40.0% (n=991), of patients.

Palliative care was more likely to be received by decedents who were younger ( $p < 0.001$ ), or female ( $p = 0.006$ ). Cancer diagnosis ( $p = 0.004$ ) was significantly associated with receiving palliative care. Decedents with upper gastrointestinal cancers were significantly more likely to receive palliative care ( $p < 0.05$ ) while decedents with lung cancer ( $p < 0.05$ ) or cancers of the central nervous system ( $p < 0.05$ ) were significantly less likely to receive palliative care (Table 1).

**Table 1 | Characteristics of the study population by palliative care provision**

| Characteristics                        | Palliative care provision (n = 2479) |              | Post-hoc                         |
|----------------------------------------|--------------------------------------|--------------|----------------------------------|
|                                        | Not received                         | Received     |                                  |
| Total number of patients: No. Row %    | 881 (35.5%)                          | 1598 (64.5%) |                                  |
| Age at death (years): No. Column %     |                                      |              |                                  |
| <50                                    | 35 (4.0%)                            | 97 (6.1%)    | <0.05                            |
| 50-59                                  | 65 (7.4%)                            | 184 (11.5%)  | <0.05                            |
| 60-69                                  | 172 (19.5%)                          | 394 (24.7%)  | <0.05                            |
| 70-79                                  | 289 (32.8%)                          | 514 (32.2%)  | n/s                              |
| 80+                                    | 320 (36.3%)                          | 409 (25.6%)  | <0.05                            |
| <i>Statistical test</i>                |                                      |              | $(\chi^2(4) = 43.22, p < 0.001)$ |
| Gender: No. Column %                   |                                      |              |                                  |
| Male                                   | 499 (56.6%)                          | 813 (50.9%)  | n/a                              |
| Female                                 | 382 (43.4%)                          | 785 (49.1%)  | n/a                              |
| <i>Statistical test</i>                |                                      |              | $(\chi^2(1) = 7.57, p = 0.006)$  |
| IMD deprivation quintile: No. Column % |                                      |              |                                  |
| Quintile 1 - Top 20% most deprived     | 272 (30.9%)                          | 502 (31.4%)  | n/a                              |
| Quintile 2                             | 166 (18.8%)                          | 315 (19.7%)  | n/a                              |
| Quintile 3                             | 142 (16.1%)                          | 252 (15.8%)  | n/a                              |
| Quintile 4                             | 182 (20.7%)                          | 317 (19.8%)  | n/a                              |
| Quintile 5 - Top 20% least deprived    | 119 (13.5%)                          | 211 (13.2%)  | n/a                              |



|                                           |             |                                  |       |
|-------------------------------------------|-------------|----------------------------------|-------|
| Missing                                   | 0 (0.0%)    | 1 (0.1%)                         | n/a   |
| <i>Statistical test</i>                   |             | $(\chi^2(4) = 0.55, p = 0.969)$  |       |
| First diagnosis cancer site: No. Column % |             |                                  |       |
| Head and neck                             | 42 (4.8%)   | 69 (4.3%)                        | n/s   |
| Upper gastrointestinal                    | 110 (12.5%) | 277 (17.3%)                      | <0.05 |
| Colorectal                                | 113 (12.8%) | 214 (13.4%)                      | n/s   |
| Lung                                      | 266 (30.2%) | 390 (24.4%)                      | <0.05 |
| Breast                                    | 81 (9.2%)   | 154 (9.6%)                       | n/s   |
| Gynaecological                            | 44 (5.0%)   | 107 (6.7%)                       | n/s   |
| Prostate                                  | 83 (9.4%)   | 149 (9.3%)                       | n/s   |
| Urological                                | 66 (7.5%)   | 125 (7.8%)                       | n/s   |
| Central nervous system                    | 31 (3.5%)   | 32 (2.0%)                        | <0.05 |
| All other cancer sites                    | 45 (5.1%)   | 81 (5.1%)                        | n/s   |
| <i>Statistical test</i>                   |             | $(\chi^2(9) = 24.18, p = 0.004)$ |       |
| Duration of illness (years)               |             |                                  |       |
| Median                                    | 1.28        | 1.26                             |       |
| IQR                                       | (0.48-3.03) | (0.52-3.20)                      |       |
| <i>Statistical test</i>                   |             | $(M-W = 701396, p = 0.882)$      |       |

$\chi^2$ =Chi-square (degrees of freedom shown in brackets); M-W=Mann-Whitney U test;  
IQR=Interquartile range; n/a=not applicable ( $\chi^2$  not significant overall or two by two table); n/s=not significant

The time between first contact with palliative care and death varied widely from less than one week to 343 weeks, with a median interval of 6 weeks (interquartile range 2 to 19 weeks). Most decedents who received palliative care received between one and three palliative care events (median 2 events, interquartile range 1 to 3 events). There was a significant positive relationship between the interval from first contact to death and number of palliative care events ( $r_s = 0.535, p < 0.001$ ).

### Place of death

Place of death was significantly associated with palliative care provision ( $p < 0.001$ ). Post-hoc tests showed that patients who received palliative care were significantly more likely to die in a hospice (39.4% versus 14.5%,  $p < 0.05$ ) and significantly less likely to die in hospital (23.3% versus 40.1%,  $p < 0.05$ ), at home (26.8% versus 31.8%,  $p < 0.05$ ), or in a care home (8.7% versus 12.0%,  $p < 0.05$ ) compared to patients who did not receive palliative care (Table 2).

For the 1598 decedents who received palliative care, a shorter time between first contact with palliative care and death was observed for hospital deaths (median 3 weeks palliative care) compared with deaths in hospice (median 7 week palliative care), at home (median 7 weeks palliative care) or in a care home (median 13 weeks palliative care) ( $p < 0.001$ ). There

was also a significant difference in the number of palliative care events by place of death ( $p < 0.001$ ), with the median number of palliative events in hospital equalling one event, compared with a median of two events for deaths at home, in a hospice, or in a care home (Table 2).

**Table 2 | Palliative care provision by place of death**

| Place of death   | Palliative care provision (n=2479) |             |          | Sub-group receiving palliative care (n = 1598) |          |                                                           |          |
|------------------|------------------------------------|-------------|----------|------------------------------------------------|----------|-----------------------------------------------------------|----------|
|                  | Not received                       | Received    | Post-hoc | Number of palliative events                    |          | Time between first contact with palliative care and death |          |
|                  | Number (%)                         | Number (%)  |          | Median (IQR)                                   | Post-hoc | Median (IQR)                                              | Post-hoc |
| Own home         | 280 (31.8)                         | 429 (26.8%) | <0.05    | 2 events (1,3)                                 | i        | 7 weeks (2.5,17)                                          | i,ii     |
| Hospice          | 128 (14.5)                         | 629 (39.4%) | <0.05    | 2 events (1,3)                                 | ii       | 7 weeks (3,19)                                            | iii,iv   |
| Hospital         | 353 (40.1)                         | 372 (23.3%) | <0.05    | 1 event (1,2)                                  | i,ii,iii | 3 weeks (1,14)                                            | i,iii,v  |
| Care home        | 106 (12.0)                         | 139 (8.7%)  | <0.05    | 2 events (1,3)                                 | iii      | 13 weeks (4,35)                                           | ii,iv,v  |
| Other            | 1 (0.1)                            | 0 (0.0%)    | -        | -                                              | -        | -                                                         | -        |
| Unknown          | 13 (1.5)                           | 29 (1.8%)   | -        | -                                              | -        | -                                                         | -        |
| Statistical test | $(\chi^2(3) = 180.52, p < 0.001)$  |             |          | $(K-W(3) = 128.14, p < 0.001)$                 |          | $(K-W(3) = 75.77, p < 0.001)$                             |          |

$\chi^2$ =Chi-squared (degrees of freedom shown in brackets); K-W = Kruskal-Wallis H test (degrees of freedom shown in brackets); Post-hoc = multiple comparison z-test statistics comparing mean ranks for each possible two category comparison group; i,ii,iii,iv,v links categories where post-hoc comparison groups which resulted in a p value less than 0.05 (after adjusting using the Bonferroni correction); IQR=Interquartile range

### Receiving at least one strong opioid prescription within the last year of life

Decedents who received palliative care were significantly more likely to have also been prescribed strong opioids before death compared with patients who did not receive palliative care (53.9% versus 25.2%,  $p < 0.001$ ).

For those decedents that received palliative care (n=1598), the time between first contact with palliative care and death and the number of palliative care events were significantly higher for decedents who received at least one strong opioid prescription (median 9 weeks palliative care versus 4 weeks palliative care,  $p < 0.001$ ; median 2 palliative care events versus 1 palliative care event,  $p < 0.001$ ) (Table 3).

**Table 3 | Palliative care provision by strong opioid prescription within the last twelve months of life**

| Strong opioid prescription within last year | Palliative care provision (n=2479) |          | Sub-group receiving palliative care (n = 1598) |                            |
|---------------------------------------------|------------------------------------|----------|------------------------------------------------|----------------------------|
|                                             | Not received                       | Received | Number of palliative                           | Time between first contact |

| of life          | Number (%)                  | Number (%)  | events<br>Median (IQR) | with palliative care and death<br>Median (IQR) |
|------------------|-----------------------------|-------------|------------------------|------------------------------------------------|
| Yes              | 222 (25.2%)                 | 862 (53.9%) | 2 events (1,4)         | 9 weeks (3,26)                                 |
| No               | 655 (74.3%)                 | 736 (46.1%) | 1 events (1,2)         | 4 weeks (1,12)                                 |
| Missing          | 4 (0.5%)                    | 0 (0.0%)    |                        |                                                |
| Statistical test | $\chi^2(1)=188.54, p<0.001$ |             | $(M-W=226447, <0.001)$ | $(M-W=233259, p<0.001)$                        |

$\chi^2$ =Chi-squared (degrees of freedom shown in brackets); M-W = Mann-Whitney U test; IQR=Interquartile range

### Timing of last chemotherapy

A significant relationship was identified between timing of last chemotherapy and receiving palliative care ( $p<0.001$ ). Post-hoc analysis showed that those who received palliative care were more likely to have been treated with chemotherapy at any point during the course of their disease (63.6% versus 47.4%,  $P<0.05$ ) and were more likely to have stopped chemotherapy over four weeks before death, compared with those not receiving palliative care (58.5% versus 42.1%,  $p<0.05$ ).

For patients who received palliative care ( $n=1598$ ) the time between first contact with palliative care and death was significantly associated with the timing of latest chemotherapy ( $p<0.001$ ) (Table 4).

**Table 4 | Palliative care provision by timing of latest chemotherapy**

| Time of latest chemotherapy | Palliative care provision (n=2479) |             |          | Sub-group receiving palliative care (n = 1598) |          |                                                           |          |
|-----------------------------|------------------------------------|-------------|----------|------------------------------------------------|----------|-----------------------------------------------------------|----------|
|                             | Not received                       | Received    | Post-hoc | Number of palliative events                    |          | Time between first contact with palliative care and death |          |
|                             | Number (%)                         | Number (%)  |          | Median (IQR)                                   | Post-hoc | Median (IQR)                                              | Post-hoc |
| No chemotherapy             | 463 (52.6%)                        | 582 (36.4%) | <0.05    | 2 events (1,3)                                 | i        | 5 weeks (2,14)                                            | i,ii     |
| 0-4 weeks                   | 47 (5.3%)                          | 82 (5.1%)   | n/s      | 1 events (1,2)                                 | i,ii     | 2 weeks (1,6)                                             | i,iii    |
| Over 4 weeks                | 371 (42.1%)                        | 934 (58.5%) | <0.05    | 2 events (1,3)                                 | ii       | 8 weeks (2,22)                                            | ii,iii   |
| Statistical test            | $\chi^2(2)=63.90, p<0.001$         |             |          | $(K-W(2)=19.94, p<0.001)$                      |          | $(K-W(2)=46.58, p<0.001)$                                 |          |

$\chi^2$ =Chi-squared (degrees of freedom shown in brackets); K-W = Kruskal-Wallis H test (degrees of freedom shown in brackets); Post-hoc = multiple comparison z-test statistics comparing mean ranks for each possible two category comparison group; i,ii,iii,iv,v links categories where post-hoc comparison groups which resulted in a p value less than 0.05 (after adjusting using the Bonferroni correction); IQR=Interquartile range; n/s=Not significant

### Emergency hospital admission within the last four weeks of life

The majority of the sample (1926 out of 2479, 77.7%) avoided emergency hospital admission in the last 4 weeks of life. A borderline significant association was identified between emergency hospital admissions in the last four weeks of life and receiving palliative care ( $p=0.049$ ). For decedents who received palliative care ( $n=1598$ ), emergency admission was associated with a significantly shorter time between first contact with palliative care

and death (4 weeks versus 7 weeks,  $p<0.001$ ) and significantly fewer palliative care events overall (2 events versus 2 events,  $p=0.010$ ) (Table 5).

**Table 5 | Palliative care provision by emergency hospital admissions within the last four weeks of life**

| Avoided emergency hospital admissions 0-4 weeks before death | Palliative care provision (n=2479) |                        | Sub-group receiving palliative care (n = 1598) |                                                                           |
|--------------------------------------------------------------|------------------------------------|------------------------|------------------------------------------------|---------------------------------------------------------------------------|
|                                                              | Not received<br>Number (%)         | Received<br>Number (%) | Number of palliative events<br>Median (IQR)    | Time between first contact with palliative care and death<br>Median (IQR) |
| Yes                                                          | 704 (79.9%)                        | 1222 (76.5%)           | 2 events (1,3)                                 | 7 weeks (2,20)                                                            |
| No (one or more admission)                                   | 177 (20.1%)                        | 376 (23.5%)            | 2 events (1,3)                                 | 4 weeks (1,12)                                                            |
| <i>Statistical test</i>                                      | $(\chi^2(1)=3.87, p=0.049)$        |                        | $(M-W=210485, p=0.010)$                        | $(M-W=185814, p<0.001)$                                                   |

$\chi^2$ =Chi-squared (degrees of freedom shown in brackets); M-W = Mann-Whitney U test; IQR=Interquartile range

### Multivariable regression

Classification tree optimum cut-off points for each of the end of life outcomes are provided in appendix 3. Between three and five optimum cut-off points were identified for the four end of life outcomes in relation to the time between first contact with palliative care and death. The multivariable (multinomial) logistic regression models, showed overall greater odds ratios for better outcomes at the end of life with longer time between first contact with palliative care and death Figure 1. Each cut-off point within the model generally represents a significantly better outcome. For example, although overall there was no association between palliative care and increased home deaths, the model shows that decedents who received 2-7 weeks of palliative care had 2.96 better odds of dying at home than in hospital (95% CI= 2.02 to 4.35,  $p<0.001$ ), and those who received more than 8 weeks of palliative care had 3.49 better odds of dying at home (95% CI= 2.42 to 5.04,  $p<0.001$ ). Similarly, there was a clear stepwise increase in the odds of receiving an opioid prescription with longer time between first contact with palliative care and death (Not received palliative care: OR=0.49, 95% CI=0.39 to 0.61,  $p<0.001$ ; 0-3 weeks palliative care: OR=1.00 95% CI=reference; 4-7 weeks palliative care: OR=1.49, 95% CI=1.12 to 1.98,  $p=0.006$ ; 8-32 weeks palliative care: OR=2.45, 95% CI=1.90 to 3.16,  $p<0.001$ ; 33+ weeks palliative care: OR=3.24, 95% CI=2.34 to 4.49,  $p<0.001$ ).

(Insert Fig 1 here)

## Discussion

Our analysis confirms existing research that better outcomes at the end of life are associated with access to palliative care services. However, we have been able to demonstrate for the first time that longer interval between first contact with palliative care and death is associated with increasingly better outcomes, specifically relating to place of death outside hospital, access to strong opioid, and avoiding chemotherapy and emergency hospital admission within the last 4 weeks of life. For some outcomes such as place of death at home, there appears to be a minimum interval between first contact with palliative care and death that is associated with higher odds of home death. This suggests that sufficient time is required to plan and co-ordinate in order to achieve this outcome for a patient. Although causality cannot be assumed, these findings provide additional evidence to support earlier assessment of palliative care needs within oncology service delivery models.

We found decedents who received palliative care were less likely to die in hospital and more likely to die in a hospice. Whilst it is important to acknowledge that for some patients dying in hospital represents appropriate end of life care, for most, care is rated significantly lower for people who die in a hospital, compared to home, a hospice or care home.<sup>20</sup> Despite this, approximately 48% of UK cancer patients die in hospital.<sup>21</sup> We identified the level of palliative care involvement associated with a reduction in hospital deaths was minimal (two contacts initiated at least three weeks before death). The potential per patient saving by avoiding a hospital death proposed by the National End of Life Information Network is £958 per patient.<sup>22</sup>

Evidence for the impact of palliative care on home death is inconsistent. We found the rate of home deaths in decedents who received palliative care was lower compared to those who did not, however the likelihood of dying at home, rather than hospital, increased as the level of palliative care involvement increased. A meta-analysis found palliative care had no impact on home deaths<sup>23</sup> while a Cochrane review undertaken the same year found it more than doubles the odds of dying at home.<sup>24</sup> These differences may reflect differences in the availability of hospice or palliative care services, or bias in the selection of suitable patients

1  
2  
3 for palliative care. Our data suggest that the interval between first contact with palliative  
4 care and death may account for this inconsistent relationship.  
5

6  
7 Opioid analgesia is the recommended treatment for moderate to severe pain<sup>25</sup> the  
8 prevalence of which in advanced cancer is estimated to be between 62% and 86%<sup>26</sup> and  
9 patients who die of cancer typically require increasing doses of opioids as their disease  
10 progresses.<sup>27</sup> We found access to palliative care was associated with being twice as likely to  
11 have access to strong opioids. However whether the referral to palliative care triggers the  
12 opioid prescription or the opioid prescription triggers the palliative care referral is unclear.  
13  
14

15  
16 Administration of chemotherapy close to death usually represents poorly planned care.<sup>28</sup> It  
17 was encouraging to find that only 5% of our study population received chemotherapy within  
18 the last four weeks of life however this limited the potential to explore the impact of  
19 palliative care on late chemotherapy. Studies that have established an association between  
20 palliative care team involvement and lower rates of chemotherapy near the end of life have  
21 concluded that cessation of chemotherapy is due to palliative care involvement.<sup>29</sup> Although  
22 a referral to palliative care may help protect against late chemotherapy, our findings suggest  
23 this association is more complex and in some cases receiving chemotherapy or the cessation  
24 of chemotherapy may in fact trigger the palliative care referral.  
25  
26  
27  
28  
29  
30  
31  
32

33 We hypothesised that decedents who received palliative care would be more likely to avoid  
34 emergency hospital admissions in the last four weeks of life though we found the opposite.  
35 Further analysis revealed that only decedents in whom first contact with palliative care was  
36 longer than four weeks before death benefited in this outcome. Decedents whose first  
37 contact occurred less than four weeks before death were more likely to require emergency  
38 admission within the last four weeks of life. This might be explained by emergency hospital  
39 admission triggering palliative care involvement. Current evidence reports that 77% of  
40 emergency cancer admissions are avoidable<sup>30</sup> so our findings indicate there is considerable  
41 scope to reduce emergency admissions provided palliative care is initiated at least 4 weeks  
42 before death  
43  
44  
45  
46  
47  
48  
49  
50

51 This study has limitations. First, the population is derived from a single UK city. Though  
52 broadly representative of the UK cancer population in prevalence of cancer type, age, sex,  
53 and survival, the extent to which the level of palliative care involvement is representative of  
54 national and international activity is harder to determine. Secondly, the data are derived  
55  
56  
57

1  
2  
3 from a live clinical system and as such are likely to represent errors or omissions inherent  
4 within the system. This was moderated by restricting linkage to a single electronic system  
5 (SystemOne) which had the best potential for reliable linkage. We acknowledge that though  
6 we included a range of potential confounder variables in the regression modelling the  
7 choice of confounders was limited by the availability and reliability of data within our  
8 datasets. Thirdly, we cannot assume that referral to or longer interval between first contact  
9 with palliative care and death caused better outcomes. For some patients, and for some  
10 outcomes (such as access to strong opioids or cessation of chemotherapy), it is possible that  
11 the outcome event itself triggered referral to palliative care. These are nevertheless  
12 important hypotheses to test further in terms of operationalising earlier integration of  
13 palliative care. In contrast, deaths outside hospital and increased home death appear more  
14 likely to be the result of longer interval from first contact with palliative care.  
15  
16  
17  
18  
19  
20  
21  
22  
23  
24  
25  
26

## 27 **Conclusion**

28 The research evidence to support early integration of palliative care for cancer patients<sup>1-6</sup> is  
29 based on relatively high intensity interventions of at least 8–12 weeks initiated  
30 approximately 6–14 months before death. Within routinely collected data, we have  
31 determined an association between longer interval from first contact with palliative care to  
32 death and important quality indicators of end of life care. Palliative care initiated more than  
33 two weeks before death was associated with avoiding a hospital death; and initiated more  
34 than four weeks before death was associated with a reduction in emergency hospital  
35 admissions and an increased likelihood of receiving an opioid analgesic. Palliative care  
36 initiated more than 32 weeks before death was associated with a reduction in  
37 chemotherapy in the last four weeks of life.  
38  
39  
40  
41  
42  
43  
44  
45

46 Characterising the impact of palliative care services based on interval between first contact  
47 and death provides new evidence which will aid policymakers when modelling palliative  
48 care service provision. Evidence of benefit in advanced non-cancer diseases remains unclear  
49 but together with other observational evidence, our findings should stimulate similar  
50 research in these populations.  
51  
52  
53  
54  
55  
56  
57

## Contributors

Conception and design: Lucy E Ziegler, Robert M West, Geoff Hall, Paul Carder, Adam Hurlow, Pablo Millares-Martin, Michael I Bennett

Collection and assembly of data: Lucy E Ziegler, Cheryl L Craigs

Data analysis and interpretation: Lucy E Ziegler, Cheryl L Craigs, Robert M West, Michael I Bennett

Manuscript writing: All authors

Final approval of manuscript: All authors

Accountable for all aspects of the work: All authors

## Funding

This study was funded by Yorkshire Cancer Research (Award L384). The views expressed in this report are those of the authors and do not necessarily represent those of Yorkshire Cancer Research. The funders had no role in the study design, data collection, data analysis, data interpretation, or writing of the report.

## Competing interests

We have read and understood BMJ policy on declaration of interests and declare that we have no competing interests.

## Ethical approval

The National Research Ethics Service (PR 13.YH.0301) granted ethical approval for the study.

## Acknowledgements

The authors would like to acknowledge the key role of Professor Rick Jones who advised on the data linkage process for this study, and Chris Jackson for his role in constructing the searches and accessing the data.



## Data Sharing

No additional data available. Electronic health records are considered “sensitive” data in the UK by the Data Protection Act and cannot be shared via public deposition due to restrictions in place to protect patient confidentiality.

## Transparency statement

The lead author affirms that the manuscript is an honest, accurate, and transparent account of the study being reported; that no important aspects of the study have been omitted; and that any discrepancies are disclosed.

## Legend for Fig 1

Fig 1 | Multivariable adjusted odds ratios from logistic and multinomial logistic regression models for end of life outcomes by time between first contact with palliative care and death cut-off points

## References

1. Smith TJ, Temin S, Alesi ER, et al: American Society of Clinical Oncology provisional clinical opinion: the integration of palliative care into standard oncology care. *J Clin Oncol* 30:880-7, 2012
2. Rugno FC, Paiva BS, Paiva CE: Early integration of palliative care facilitates the discontinuation of anticancer treatment in women with advanced breast or gynecologic cancers. *Gynecol Oncol* 135:249-54, 2014
3. Bakitas MA, Tosteson TD, Li Z, et al: Early Versus Delayed Initiation of Concurrent Palliative Oncology Care: Patient Outcomes in the ENABLE III Randomized Controlled Trial. *J Clin Oncol* 33:1438-45, 2015
4. Greer JA, Jackson VA, Meier DE, et al: Early integration of palliative care services with standard oncology care for patients with advanced cancer. *CA Cancer J Clin* 63:349-63, 2013
5. Temel JS, Greer JA, Muzikansky A, et al: Early palliative care for patients with metastatic non-small-cell lung cancer. *N Engl J Med* 363:733-42, 2010
6. Zimmermann C, Swami N, Krzyzanowska M, et al: Early palliative care for patients with advanced cancer: a cluster-randomised controlled trial. *Lancet* 383:1721-30, 2014
7. Osta BE, Palmer JL, Paraskevopoulos T, et al: Interval between first palliative care consult and death in patients diagnosed with advanced cancer at a comprehensive cancer center. *J Palliat Med* 11:51-7, 2008
8. Bennett MI, Ziegler L, Allsop M, et al: What determines duration of palliative care before death for patients with advanced disease? A retrospective cohort study of community and hospital palliative care provision in a large UK city. *BMJ Open* Accepted November 2016, 2016
9. Henson L, Gao W, Higginson I, et al: Emergency department attendance by patients with cancer in the last month of life: a systematic review and meta-analysis. *Lancet* 385 Suppl 1:S41, 2015

- 1  
2  
3 10. Seow H, Brazil K, Sussman J, et al: Impact of community based, specialist  
4 palliative care teams on hospitalisations and emergency department visits late in life and  
5 hospital deaths: a pooled analysis. *Bmj* 348:g3496, 2014  
6  
7
- 8 11. Blackhall LJ, Read P, Stukenborg G, et al: CARE Track for Advanced Cancer:  
9 Impact and Timing of an Outpatient Palliative Care Clinic. *J Palliat Med* 19:57-63, 2016  
10  
11
- 12 12. Bharadwaj P, Helfen KM, Deleon LJ, et al: Making the Case for Palliative Care  
13 at the System Level: Outcomes Data. *J Palliat Med* 19:255-8, 2016  
14  
15
- 16 13. National Council of Palliative Care: Commissioning Guidance for Specialist  
17 Palliative Care: Helping to deliver commissioning objectives, December 2012, Guidance  
18 document published collaboratively with the association for Palliative Medicine of Great  
19 Britain and Ireland, Consultant nurse in palliative care reference group, Marie Curie Cancer  
20 Care, National Council for palliative Care and Palliative care Section of the Royal Society of  
21 Medicine. London UK, 2012  
22  
23  
24  
25  
26
- 27 14. Department of Health: End of Life Care Strategy – promoting high quality care  
28 for all adults at the end of life. London Central Office of Information, Crown, 2008  
29  
30
- 31 15. National Institute for Health and Care Excellence: Quality Standard for end of  
32 life care for adults, End of life care (ed Issued August 2011 last modified October 2013).  
33 London, UK, 2011  
34  
35  
36
- 37 16. Ziegler L, Mulvey M, Blenkinsopp A, et al: Opioid prescribing for patients with  
38 cancer in the last year of life: a longitudinal population cohort study. *Pain* 157:2445-2451,  
39 2016  
40  
41
- 42 17. Dunn OJ: Multiple comparisons using rank sums. *Technometrics* 6:241-252,  
43 1964  
44  
45
- 46 18. Copolov D, Singh B: Constructing a minimal diagnostic decision tree. *Meth*  
47 *Inform Med* 32:161-6, 1993  
48  
49
- 50 19. National Institute of Clinical Excellence: Safe and Effective Prescribing of  
51 Strong opioids in palliative care of adults. . London, Uk National Institute of Clinical  
52 Excellence,, 2011  
53  
54  
55  
56  
57

1  
2  
3                   20.     Office for National Statistics: Statistical Bulletin: National Survey of Bereaved  
4 People (VOICES): England 2015, ONS, 2016  
5

6                   21.     Gao W, Ho YK, Verne J, et al: Changing patterns in place of cancer death in  
7 England: a population-based study. PLoS Med 10:e1001410, 2013  
8  
9

10                  22.     Dixon J, King D, Matosevic T, et al: Equity in the Provision of Palliative Care in  
11 the UK; review of Evidence   PSSRU Discussion Paper 2894. London London School of  
12 Economics 2015  
13  
14

15                  23.     Lockett T, Davidson PM, Lam L, et al: Do community specialist palliative care  
16 services that provide home nursing increase rates of home death for people with life-  
17 limiting illnesses? A systematic review and meta-analysis of comparative studies. J Pain  
18 Symptom Manage 45:279-97, 2013  
19  
20  
21

22                  24.     Gomes B, Calanzani N, Curiale V, et al: Effectiveness and cost-effectiveness of  
23 home palliative care services for adults with advanced illness and their caregivers. Cochrane  
24 Database Syst Rev:Cd007760, 2013  
25  
26  
27

28                  25.     National Institute for Health and Clinical Excellence: Safe and Effective  
29 Prescribing of Strong Opioids for Pain in Palliative Care of Adults, Opioids in Palliative Care:  
30 NICE Clinical guideline No.140 Cardiff (UK), National Collaborating Centre for Cancer, 2012  
31  
32  
33

34                  26. Gagnon, B, Scott S, Nadeau L, Lawlor P. Patterns of Community Based opioid  
35 Prescriptions in people Dying of Cancer. Journal of Pain and Symptom Management Vol 49  
36 No.1 2015  
37  
38  
39

40                  27. van den Beuken-van Everdingen MH, de Rijke JM, Kessels AG, et al: Prevalence of  
41 pain in patients with cancer: a systematic review of the past 40 years. Ann Oncol 18:1437-  
42 49, 2007  
43  
44  
45

46                  28.     Pirl WF, Greer JA, Irwin K, et al: Processes of discontinuing chemotherapy for  
47 metastatic non-small-cell lung cancer at the end of life. J Oncol Pract 11:e405-12, 2015  
48  
49

50                  29.     Karim SM, Zekri J, Abdelghany E, et al: Time from last chemotherapy to death  
51 and its correlation with the end of life care in a referral hospital. Indian J Med Paediatr  
52 Oncol 36:55-9, 2015  
53  
54  
55

1  
2  
3 30. Delgado-Guay MO, Kim YJ, Shin SH, et al: Avoidable and unavoidable visits to  
4 the emergency department among patients with advanced cancer receiving outpatient  
5 palliative care. J Pain Symptom Manage 49:497-504, 2015  
6  
7  
8  
9  
10  
11  
12  
13  
14  
15  
16  
17  
18  
19  
20  
21  
22  
23  
24  
25  
26  
27  
28  
29  
30  
31  
32  
33  
34  
35  
36  
37  
38  
39  
40  
41  
42  
43  
44  
45  
46  
47  
48  
49  
50  
51  
52  
53  
54  
55  
56  
57

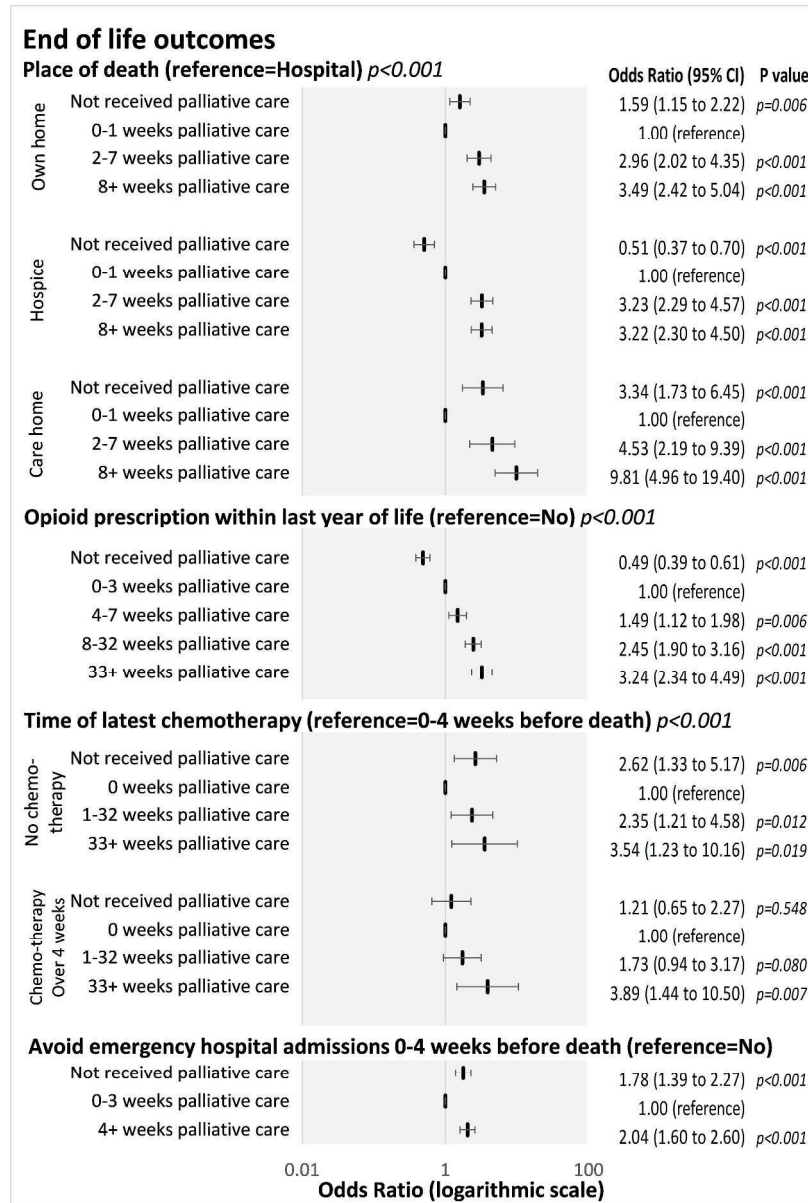

Figure 1

343x512mm (300 x 300 DPI)

## Appendix 1: READ codes extracted from SystemOne

| READ codes                                                    | Indicate active palliative care? |
|---------------------------------------------------------------|----------------------------------|
| (1Z01.) Terminal illness - late stage                         | No                               |
| (8BA2.) End of life care                                      | No                               |
| (8H6A.) Refer to terminal care consult                        | Yes                              |
| (8H7L.) Refer for terminal care                               | Yes                              |
| (9EB5.) DS 1500 Disability living allowance completed         | No                               |
| (Xa9tS) For resuscitation                                     | No                               |
| (Xa9tT) Not for resuscitation                                 | No                               |
| (XaAex) Referral to palliative care service                   | Yes                              |
| (XaAg6) Referral to palliative care physician                 | Yes                              |
| (XaAPW) Under care of palliative care physician               | Yes                              |
| (XaAT5) Seen by palliative care physician                     | Yes                              |
| (XaAWN) Seen by palliative care medicine - service            | Yes                              |
| (XaEJE) Palliative care                                       | No                               |
| (XaIlk) Referred to community specialist palliative care team | Yes                              |
| (XaIpI) Palliative treatment                                  | Yes                              |
| (XaIpI) Final days pathway                                    | No                               |
| (XaIpX) Preferred place of death                              | No                               |
| (Xalse) Specialist palliative care treatment                  | Yes                              |
| (Xalsy) Preferred place of death discussed with patient       | No                               |
| (Xalt6) Specialist palliative care treatment – day care       | Yes                              |
| (Xalt7) Specialist palliative care treatment - outpatient     | Yes                              |
| (XaJ3g) Preferred place of death: home                        | No                               |
| (XaJ3h) Preferred place of death: hospice                     | No                               |
| (XaJ3j) Preferred place of death: hospital                    | No                               |
| (XaJ3k) Preferred place of death: nursing home                | No                               |

|    |                                                              |    |
|----|--------------------------------------------------------------|----|
| 1  |                                                              |    |
| 2  |                                                              |    |
| 3  | (XaJv2) On gold standards palliative care framework          | No |
| 4  |                                                              |    |
| 5  | (XaLwc) Resuscitation discussed with patient                 | No |
| 6  |                                                              |    |
| 7  | (XaLwd) Resuscitation discussed with carer                   | No |
| 8  |                                                              |    |
| 9  | (XaMhi) Liverpool care pathway for the dying                 | No |
| 10 |                                                              |    |
| 11 | (XaPmq) Issue of palliative care anticipatory medication box | No |
| 12 |                                                              |    |
| 13 | (XaQ8S) Anticipatory palliative care                         | No |
| 14 |                                                              |    |
| 15 | (XaQg1) Last days of life                                    | No |
| 16 |                                                              |    |
| 17 | (XaQzq) Preferred place of death: pt unable to express       | No |
| 18 |                                                              |    |
| 19 | preference                                                   |    |
| 20 |                                                              |    |
| 21 | (XaQzr) Preferred place of death: discussion not appropriate | No |
| 22 |                                                              |    |
| 23 | (XaQzt) Preferred place of death: patient undecided          | No |
| 24 |                                                              |    |
| 25 | (XaR50) GSF supportive care stage 1 - advancing disease      | No |
| 26 |                                                              |    |
| 27 | (XaR53) GSF supportive care stage 2 - increasing decline     | No |
| 28 |                                                              |    |
| 29 | (XaR5A) GSF supportv care stge 3 - last days: cat C - wks    | No |
| 30 |                                                              |    |
| 31 | prognosis                                                    |    |
| 32 |                                                              |    |
| 33 | (XaRFF) Has end of life advance care plan                    | No |
| 34 |                                                              |    |
| 35 | (XaRFG) On end of life care register                         | No |
| 36 |                                                              |    |
| 37 | (XaX46) GSF supportv care stge 3 - last days: cat B - mth    | No |
| 38 |                                                              |    |
| 39 | prognosis                                                    |    |
| 40 |                                                              |    |
| 41 | (ZV57C) [V]Palliative care                                   | No |
| 42 |                                                              |    |
| 43 |                                                              |    |
| 44 |                                                              |    |
| 45 |                                                              |    |
| 46 |                                                              |    |
| 47 |                                                              |    |
| 48 |                                                              |    |
| 49 |                                                              |    |
| 50 |                                                              |    |
| 51 |                                                              |    |
| 52 |                                                              |    |
| 53 |                                                              |    |
| 54 |                                                              |    |
| 55 |                                                              |    |
| 56 |                                                              |    |
| 57 |                                                              |    |
| 58 |                                                              |    |
| 59 |                                                              |    |
| 60 |                                                              |    |



**Appendix 2. Medications identified as strong opioids**

- Buprenorphine (>10mcg)
- Diamorphine
- Dipipanone (with cyclizine)
- Fentanyl
- Hydromorphone
- Meptazinol
- Morphine
- Oxycodone
- Pentazocine
- Papaveretum
- Pethidine

For peer review only

### Appendix 3: Classification tree duration of palliative care cut-off points by end of life quality outcomes

#### Place of death

|                              | Cut-off points (n=2436): number (column %) |                    |                    |                    | Total                         |
|------------------------------|--------------------------------------------|--------------------|--------------------|--------------------|-------------------------------|
|                              | Not received                               | 0-1 weeks          | 2-7 weeks          | 8+ weeks           |                               |
| Own home                     | 280 (32.3%)                                | 70 (21.1%)         | 148 (28.1%)        | 211 (29.7%)        | 709 (29.1%)                   |
| Hospice                      | 128 (14.8%)                                | 104 (31.4%)        | 237 (45.0%)        | 288 (40.5%)        | 757 (31.1%)                   |
| Hospital                     | 353 (40.7%)                                | 146 (44.1%)        | 105 (19.9%)        | 121 (17.0%)        | 725 (29.8%)                   |
| Care home                    | 106 (12.2%)                                | 11 (3.3%)          | 37 (7.0%)          | 91 (12.8%)         | 245 (10.1%)                   |
| <i>Statistical test</i>      |                                            |                    |                    |                    | $(\chi^2(9)=280.75, p<0.001)$ |
| <b>Total: Number (row %)</b> | <b>867 (35.6%)</b>                         | <b>331 (13.6%)</b> | <b>527 (21.6%)</b> | <b>711 (29.2%)</b> | <b>2436</b>                   |

#### Opioid prescription within last year of life

|                              | Cut-off points (n=2475): number (column %) |                    |                    |                    |                    | Total                         |
|------------------------------|--------------------------------------------|--------------------|--------------------|--------------------|--------------------|-------------------------------|
|                              | Not received                               | 0-3 weeks          | 4-7 weeks          | 8-32 weeks         | 33+ weeks          |                               |
| Yes                          | 222 (25.3%)                                | 237 (41.3%)        | 149 (50.0%)        | 299 (62.8%)        | 177 (70.8%)        | 1084 (43.8%)                  |
| No                           | 655 (74.7%)                                | 337 (58.7%)        | 149 (50.0%)        | 177 (37.2%)        | 73 (29.2%)         | 1391 (56.2%)                  |
| <i>Statistical test</i>      |                                            |                    |                    |                    |                    | $(\chi^2(4)=279.01, p<0.001)$ |
| <b>Total: Number (row %)</b> | <b>877 (35.4%)</b>                         | <b>574 (23.2%)</b> | <b>298 (12.0%)</b> | <b>476 (19.2%)</b> | <b>250 (10.1%)</b> | <b>2475</b>                   |

#### Time of latest chemotherapy

|                              | Cut-off points (n=2479): number (column %) |                   |                     |                    | Total                         |
|------------------------------|--------------------------------------------|-------------------|---------------------|--------------------|-------------------------------|
|                              | Not received                               | 0 weeks           | 1-32 weeks          | 33+ weeks          |                               |
| No chemotherapy              | 463 (52.6%)                                | 50 (30.7%)        | 466 (39.4%)         | 66 (26.4%)         | 1045 (42.2%)                  |
| 0-4 weeks                    | 47 (5.3%)                                  | 16 (9.8%)         | 60 (5.1%)           | 6 (2.4%)           | 129 (5.2%)                    |
| 5+ weeks                     | 371 (42.1%)                                | 97 (59.5%)        | 659 (55.6%)         | 178 (71.2%)        | 1305 (52.6%)                  |
| <i>Statistical test</i>      |                                            |                   |                     |                    | $(\chi^2(3)=55.494, p<0.001)$ |
| <b>Total: Number (row %)</b> | <b>881 (35.5%)</b>                         | <b>163 (6.6%)</b> | <b>1185 (47.8%)</b> | <b>250 (10.1%)</b> | <b>2479</b>                   |

#### Avoided emergency hospital admissions 0-4 weeks before death

|                              | Cut-off points (n=2479): number (column %) |                    |                     | Total                         |
|------------------------------|--------------------------------------------|--------------------|---------------------|-------------------------------|
|                              | Not received                               | 0-3 weeks          | 4+ weeks            |                               |
| Yes                          | 704 (79.9%)                                | 392 (68.3%)        | 830 (81.1%)         | 1926 (77.7%)                  |
| No (one or more admission)   | 177 (20.1%)                                | 182 (31.7%)        | 194 (18.9%)         | 553 (22.3%)                   |
| <i>Statistical test</i>      |                                            |                    |                     | $(\chi^2(2)=36.390, p<0.001)$ |
| <b>Total: Number (row %)</b> | <b>881 (35.5%)</b>                         | <b>574 (23.2%)</b> | <b>1024 (41.3%)</b> | <b>2479</b>                   |

# BMJ Open

## Is palliative care support associated with better quality end of life care indicators for patients with advanced cancer? A retrospective cohort study

|                                 |                                                                                                                                                                                                                                                                                                                                                                                                                                                                                    |
|---------------------------------|------------------------------------------------------------------------------------------------------------------------------------------------------------------------------------------------------------------------------------------------------------------------------------------------------------------------------------------------------------------------------------------------------------------------------------------------------------------------------------|
| Journal:                        | <i>BMJ Open</i>                                                                                                                                                                                                                                                                                                                                                                                                                                                                    |
| Manuscript ID                   | bmjopen-2017-018284.R2                                                                                                                                                                                                                                                                                                                                                                                                                                                             |
| Article Type:                   | Research                                                                                                                                                                                                                                                                                                                                                                                                                                                                           |
| Date Submitted by the Author:   | 11-Dec-2017                                                                                                                                                                                                                                                                                                                                                                                                                                                                        |
| Complete List of Authors:       | Ziegler, Lucy; University of Leeds, Leeds Institute of Health Sciences<br>Craigs , Cheryl; University of Leeds, Leeds Institute of Health Sciences<br>West, Robert; University of Leeds, Biostatistics<br>Carder, Paul ; NHS Bradford and Districts CCGs<br>Hurlow, Adam; Leeds General Infirmary<br>Millares Martin, Pablo; Whitehall Surgery,<br>Hall, Geoff; St James's University Teaching Hospital,<br>Bennett, Mike; University of Leeds, Leeds Institute of Health Sciences |
| <b>Primary Subject Heading</b>: | Palliative care                                                                                                                                                                                                                                                                                                                                                                                                                                                                    |
| Secondary Subject Heading:      | Oncology                                                                                                                                                                                                                                                                                                                                                                                                                                                                           |
| Keywords:                       | PALLIATIVE CARE, ONCOLOGY, end of life care, transitions in cancer care                                                                                                                                                                                                                                                                                                                                                                                                            |
|                                 |                                                                                                                                                                                                                                                                                                                                                                                                                                                                                    |

SCHOLARONE™  
Manuscripts

Only

## Title

Is palliative care support associated with better quality end of life care indicators for patients with advanced cancer? A retrospective cohort study.

## Authors

Dr Lucy E Ziegler<sup>1</sup>, University Academic Fellow

Dr Cheryl L Craigs<sup>1</sup>, Senior Statistician

Prof Robert M West<sup>2</sup>, Professor of Biostatistics

Mr Paul Carder<sup>3</sup>, Head of Research

Dr Adam Hurlow<sup>4</sup>, Consultant in Palliative Medicine

Dr Pablo Millares-Martin<sup>5</sup>, End of Life Clinical Lead

Dr Geoff Hall<sup>4</sup>, Lead Clinician for Cancer Services

Prof Michael I Bennett<sup>1</sup>, Professor of Palliative Medicine

1. Academic Unit of Palliative Care, Leeds Institute of Health Sciences, University of Leeds, Worsley Building, Clarendon Way, Leeds, LS2 9NL, UK
2. Health Services Research, Leeds Institute of Health Sciences, University of Leeds, Worsley Building, Clarendon Way, Leeds, LS2 9NL, UK
3. NHS Bradford Districts Clinical Commissioning Group, Douglas Mill, Bowling Old Lane, Bradford, BD5 7JR, UK
4. Leeds General Infirmary, Great George St, Leeds, LS1 3EX, UK
5. Leeds West Clinical Commissioning Group, Suites B5-B9, Wira House, Wira Business Park, Leeds, LS16 6EB, UK

## Corresponding Author

Dr Lucy E Ziegler, [L.E.Ziegler@leeds.ac.uk](mailto:L.E.Ziegler@leeds.ac.uk), +44 (0) 113 343 7351

The Corresponding Author has the right to grant on behalf of all authors and does grant on behalf of all authors, a worldwide licence to the Publishers and its licensees in perpetuity, in

1  
2  
3 all forms, formats and media (whether known now or created in the future), to i) publish,  
4 reproduce, distribute, display and store the Contribution, ii) translate the Contribution into  
5 other languages, create adaptations, reprints, include within collections and create  
6 summaries, extracts and/or, abstracts of the Contribution, iii) create any other derivative  
7 work(s) based on the Contribution, iv) to exploit all subsidiary rights in the Contribution, v)  
8 the inclusion of electronic links from the Contribution to third party material where-ever it  
9 may be located; and, vi) licence any third party to do any or all of the above.  
10  
11  
12  
13  
14  
15  
16  
17  
18  
19  
20  
21  
22  
23  
24  
25  
26  
27  
28  
29  
30  
31  
32  
33  
34  
35  
36  
37  
38  
39  
40  
41  
42  
43  
44  
45  
46  
47  
48  
49  
50  
51  
52  
53  
54  
55  
56  
57

## Abstract

### Objectives

This study aimed to establish the association between timing and provision of palliative care and quality of end-of-life care indicators in a population of patients dying of cancer.

### Setting

This study uses linked cancer patient data from the National Cancer Registry, the electronic medical record system used in primary care (SystemOne) and the electronic medical record system used within a specialist regional cancer centre. The population resided in a single city in Northern England.

### Participants

Retrospective data from 2479 adult cancer decedents who died between January 2010 and February 2012, were registered with a primary care provider using the SystemOne electronic health record system, and cancer was certified as a cause of death, were included in the study.

### Results

Linkage yielded data on 2479 cancer decedents, with 64.5% who received at least one palliative care (PC) event. Decedents who received PC were significantly more likely to die in a hospice (39.4% versus 14.5%,  $p < 0.005$ ) and less likely to die in hospital (23.3% versus 40.1%,  $p < 0.05$ ), and were more likely to receive an opioid (53.9% versus 25.2%,  $p < 0.001$ ). Palliative care initiated more than 2 weeks before death was associated with avoiding a hospital death. ( $\geq 2$  weeks,  $p < 0.001$ ), more than four weeks before death was associated with avoiding emergency hospital admissions and increased access to an opioid ( $\geq 4$  weeks,  $p < 0.001$ ), and more than 33 weeks before death was associated with avoiding late chemotherapy ( $\geq 33$  weeks. No chemotherapy  $p = 0.019$ , Chemotherapy over 4 weeks  $p = 0.007$ ) and

### Conclusion

For decedents with advanced cancer, access to palliative care and longer duration of palliative care were significantly associated with better end of life quality indicators.

## Strengths and limitations of this study

- To the best of our knowledge this is the first UK study to explore the associations between duration of palliative care and quality of end of life care in a large population of cancer decedents.
- The data used in this study are derived from a live clinical system and as such are likely to represent errors or omissions inherent within that system.
- The definition of good quality end of life care used in this study is informed by UK policy and guidance on end of life care provision. We recognise that what constitutes good quality care at the end of life can vary by individual and that the study does not capture individual preferences or circumstances.

## Introduction

Integration of palliative care alongside oncology management should be considered early in the course of illness for patients with metastatic cancer or high symptom burden, according to American Society of Clinical Oncology guidelines.<sup>1</sup> This recommendation is based on a number of randomised controlled trials, largely from North America, which found early palliative care was associated with improved quality of life and a reduction in acute hospital admissions and aggressive cancer treatments at the end of life.<sup>2-6</sup> Though there were inconsistencies across trials, in general common characteristics were an assessment and several follow up consultations by specialist palliative care teams over a period of 2–3 months, which occurred about 6–14 months before patients died.

Compared to patients recruited to these clinical trials, cancer patients in routine care are often referred to palliative care services much later in the course of their illness.<sup>7</sup> We recently showed that for 4650 cancer patients in Leeds, median contact was 34 days for community and hospital palliative care services.<sup>8</sup> The relatively short duration of palliative care in routine services might limit the opportunity for identification of needs and the subsequent provision of effective support and symptom management. This could adversely impact on end of life outcomes.

Systematic reviews and pooled analyses of routinely collected data have demonstrated an association between palliative care intervention and increased proportion of home deaths as well as reduction in emergency admissions.<sup>9,10</sup> However, no study has quantified these associations in relation to duration of palliative care. In order to more directly inform models of service delivery, better quality data is needed on how long patients with cancer need to receive palliative care before important improvements in end of life care can be observed.

We report a retrospective cohort study that linked routinely collected data on hospital and community healthcare resource use in cancer decedents.

We chose this study design because it enabled us to examine the effects of palliative care service delivery in routine care for a case series of cancer decedents and minimised recruitment bias from a clinical trial design. We wanted to test the hypothesis that contact



with and longer duration of palliative care would be associated with better end of life care quality indicators for patients with advanced cancer.

## Methods

### Study population

Retrospective data from 2479 adult (aged at least 18 years at death) cancer decedents who died between January 2010 and February 2012, resided within a single UK city, were registered with a primary care provider using the SystmOne electronic health record system, and cancer was certified as a cause of death, were included in the study.

### Data collection

Data was obtained from three sources, the Northern and Yorkshire Cancer Registry and Information Service (NYCRIS), SystmOne, and the Patient Pathway Manager (PPM). NYCRIS maintain a database of all cancers occurring in the Northern and Yorkshire region in England. SystemOne is an electronic health record system used by approximately 75% of primary care providers in Leeds. PPM is a clinical information system used at a regional specialist cancer centre to manage and coordinate patient care.

Decedents eligible for the study were identified from the NYCRIS database based on address, date of death, and cause of death. The NYCRIS database provided all demographic, diagnostic, and death information. SystmOne provided opioid prescription information and community palliative care provision. PPM provided chemotherapy treatment, emergency hospital admissions and hospital based palliative care referral information. The three data sources were linked using an open pseudonymiser system to create an encrypted code based on NHS numbers.

### Assessment of palliative care provision

The primary measure of palliative care provision used in this study was time between first contact with palliative care and death, measured as time in weeks. Both hospital and community based records of palliative care events were included.

The PPM system provided information on hospital based palliative care referrals. For each patient included in our study every unique palliative care referral date recorded on the PPM system was identified as a unique palliative care event. Community palliative care provision

1  
2  
3 was estimated using GP communications within SystemOne, based on a multistage approach.  
4 In the first stage any GP communication within SystemOne which included either a palliative  
5 care based READ code or included text indicating palliative care, based on a keyword search,  
6 was extracted from SystemOne as a list of records, with the possibility of multiple records  
7 per patient. In the second stage only records which extended up to the date of death and  
8 included either a READ code indicating the active provision of palliative care, identified  
9 through consensus between authors (see appendix 1), or included communication with a  
10 hospice, were identified as representing palliative care provision. For each patient every  
11 unique palliative care provision date recorded in SystemOne was identified as a unique  
12 palliative care event representing contact with a palliative care team member.  
13  
14  
15  
16  
17  
18  
19

20 The total number of palliative care events identified for each patient was a secondary  
21 measure of palliative care provision which was used as a proxy to indicate the extent of  
22 palliative care support provided.  
23  
24  
25

## 26 **Outcomes**

27  
28 The end of life quality indicators assessed were informed by UK policy and international  
29 research evidence on what constitutes quality end of life care provision for patients with  
30 cancer<sup>3,5,11-15</sup> and included place of death, access to strong opioids within the last year of life  
31 (identified if decedents received at least one opioid prescription within the last 12 months  
32 of life), timing of last chemotherapy treatment, and emergency hospital admission up to 4  
33 weeks before death. We chose these because a reduction in hospital use at the end of life is  
34 commonly used as a proxy for better quality care<sup>3,5,11-15</sup> Recently we have demonstrated the  
35 relatively late onset of strong opioid prescribing before death in a cohort of cancer  
36 patients.<sup>16</sup> We judged that given the prevalence of pain in advanced cancer access to strong  
37 opioids could also be a proxy for better quality care.  
38  
39  
40  
41  
42  
43  
44  
45

46 Place of death was categorised as own home, hospice, hospital, care home, other or  
47 unknown. Decedents with at least one strong opioid prescription were coded as yes, with  
48 prescriptions other than a strong opioid within the last year were coded as no. The list of  
49 strong opioids included are provided in appendix 2. Decedents without a prescription were  
50 coded as missing. The timing of chemotherapy was categorised into either no  
51 chemotherapy, chemotherapy 0–4 weeks before death, or chemotherapy over 4 weeks  
52 before death. The number of emergency admissions to hospital in last 4 weeks of life were  
53  
54  
55  
56  
57  
58  
59  
60

1  
2  
3 grouped into avoided emergency admission or did not avoid emergency admission (one or  
4 more emergency admissions).  
5

### 6 7 **Covariates**

8  
9 Covariates considered were age, categorised into younger than 50 years, older than 80  
10 years, and deciles in between; sex (male or female); Indices of Multiple Deprivation (IMD)  
11 quintile (where 1 = most deprived and 5 = least deprived); cancer diagnosis; and duration of  
12 illness (in years) before death.  
13  
14

### 15 16 **Statistical analysis**

17  
18 We used Pearson's chi-square ( $\chi^2$ ) to test associations between receiving palliative care and  
19 end of life quality outcomes. Post-hoc  $\chi^2$  tests were conducted for each possible 2 by 2 table  
20 comparison, adjusted using the Bonferroni correction, where outcomes included more than  
21 two categories and the  $\chi^2$  resulted in a p value of less than 0.05. The association between  
22 duration of palliative care and number of palliative care events was explored through  
23 frequency tables and the Spearman's rank correlation coefficient. Differences in median  
24 scores were compared using the Mann-Whitney U test, for two group comparisons, or the  
25 Kruskal-Wallis H test, for more than two groups. Where statistically significant results were  
26 identified from the Kruskal-Wallis H test Dunn–Bonferroni post-hoc tests for multiple  
27 comparisons of rank sums, based on the z-statistics, were conducted for each possible  
28 combination of two group comparisons.<sup>17</sup>  
29  
30  
31  
32  
33  
34  
35  
36  
37

38 We constructed a classification tree for each end of life care outcome, using chi-squared  
39 automatic interaction detection (CHAID), to identify, for each outcome, the optimum cut-off  
40 points for duration of palliative care.<sup>18</sup> Each CHAID classification tree included palliative care  
41 duration as the only predictor variable. Nodes associated with the first branch of the  
42 dendrogram identified the optimum duration of palliative care cut-off points. Where the  
43 cut-off point was 0 weeks palliative care, this reflected contact with palliative care but  
44 within 7 days of death. Multivariable regression models (logistic and multinomial) were used  
45 to investigate the role of these cut-off points on end of life care outcomes, after controlling  
46 for age at death, gender, IMD deprivation quintile, first diagnosis cancer site and duration of  
47 illness. Results are presented as odds ratios (ORs) alongside 95% confidence intervals (95%  
48 CI).  
49  
50  
51  
52  
53  
54  
55  
56  
57

Complete case analysis was undertaken. P values less than 0.05 were considered statistically significant (2-tailed). Analysis was conducted using IBM SPSS statistics version 23.

### Public involvement

Patients were involved in setting the research question and in the design of the study, no patients were asked for advice on interpretation or writing up of results. The results of the research have been disseminated to the patient community through patient forums.

## Results

### Patient characteristics

Of the 2479 patients included in the study 64.5% (n=1598) received at least one palliative care event. Community based palliative care was received by 45.3% (n=1124), and hospital based palliative care was received by 40.0% (n=991), of patients.

Palliative care was more likely to be received by decedents who were younger ( $p < 0.001$ ), or female ( $p = 0.006$ ). Cancer diagnosis ( $p = 0.004$ ) was significantly associated with receiving palliative care. Decedents with upper gastrointestinal cancers were significantly more likely to receive palliative care ( $p < 0.05$ ) while decedents with lung cancer ( $p < 0.05$ ) or cancers of the central nervous system ( $p < 0.05$ ) were significantly less likely to receive palliative care (Table 1).

**Table 1 | Characteristics of the study population by palliative care provision**

| Characteristics                        | Palliative care provision (n = 2479) |              | Post-hoc                         |
|----------------------------------------|--------------------------------------|--------------|----------------------------------|
|                                        | Not received                         | Received     |                                  |
| Total number of patients: No. Row %    | 881 (35.5%)                          | 1598 (64.5%) |                                  |
| Age at death (years): No. Column %     |                                      |              |                                  |
| <50                                    | 35 (4.0%)                            | 97 (6.1%)    | <0.05                            |
| 50-59                                  | 65 (7.4%)                            | 184 (11.5%)  | <0.05                            |
| 60-69                                  | 172 (19.5%)                          | 394 (24.7%)  | <0.05                            |
| 70-79                                  | 289 (32.8%)                          | 514 (32.2%)  | n/s                              |
| 80+                                    | 320 (36.3%)                          | 409 (25.6%)  | <0.05                            |
| <i>Statistical test</i>                |                                      |              | $(\chi^2(4) = 43.22, p < 0.001)$ |
| Gender: No. Column %                   |                                      |              |                                  |
| Male                                   | 499 (56.6%)                          | 813 (50.9%)  | n/a                              |
| Female                                 | 382 (43.4%)                          | 785 (49.1%)  | n/a                              |
| <i>Statistical test</i>                |                                      |              | $(\chi^2(1) = 7.57, p = 0.006)$  |
| IMD deprivation quintile: No. Column % |                                      |              |                                  |
| Quintile 1 - Top 20% most deprived     | 272 (30.9%)                          | 502 (31.4%)  | n/a                              |
| Quintile 2                             | 166 (18.8%)                          | 315 (19.7%)  | n/a                              |
| Quintile 3                             | 142 (16.1%)                          | 252 (15.8%)  | n/a                              |
| Quintile 4                             | 182 (20.7%)                          | 317 (19.8%)  | n/a                              |
| Quintile 5 - Top 20% least deprived    | 119 (13.5%)                          | 211 (13.2%)  | n/a                              |

|                                           |             |             |                                  |
|-------------------------------------------|-------------|-------------|----------------------------------|
| Missing                                   | 0 (0.0%)    | 1 (0.1%)    | n/a                              |
| <i>Statistical test</i>                   |             |             | $(\chi^2(4) = 0.55, p = 0.969)$  |
| First diagnosis cancer site: No. Column % |             |             |                                  |
| Head and neck                             | 42 (4.8%)   | 69 (4.3%)   | n/s                              |
| Upper gastrointestinal                    | 110 (12.5%) | 277 (17.3%) | <0.05                            |
| Colorectal                                | 113 (12.8%) | 214 (13.4%) | n/s                              |
| Lung                                      | 266 (30.2%) | 390 (24.4%) | <0.05                            |
| Breast                                    | 81 (9.2%)   | 154 (9.6%)  | n/s                              |
| Gynaecological                            | 44 (5.0%)   | 107 (6.7%)  | n/s                              |
| Prostate                                  | 83 (9.4%)   | 149 (9.3%)  | n/s                              |
| Urological                                | 66 (7.5%)   | 125 (7.8%)  | n/s                              |
| Central nervous system                    | 31 (3.5%)   | 32 (2.0%)   | <0.05                            |
| All other cancer sites                    | 45 (5.1%)   | 81 (5.1%)   | n/s                              |
| <i>Statistical test</i>                   |             |             | $(\chi^2(9) = 24.18, p = 0.004)$ |
| Duration of illness (years)               |             |             |                                  |
| Median                                    | 1.28        | 1.26        |                                  |
| IQR                                       | (0.48-3.03) | (0.52-3.20) |                                  |
| <i>Statistical test</i>                   |             |             | $(M-W = 701396, p = 0.882)$      |

$\chi^2$ =Chi-square (degrees of freedom shown in brackets); M-W=Mann-Whitney U test;  
IQR=Interquartile range; n/a=not applicable ( $\chi^2$  not significant overall or two by two table); n/s=not significant

The time between first contact with palliative care and death varied widely from less than one week to 343 weeks, with a median interval of 6 weeks (interquartile range 2 to 19 weeks). Most decedents who received palliative care received between one and three palliative care events (median 2 events, interquartile range 1 to 3 events). There was a significant positive relationship between the interval from first contact to death and number of palliative care events ( $r_s = 0.535, p < 0.001$ ).

### Place of death

Place of death was significantly associated with palliative care provision ( $p < 0.001$ ). Post-hoc tests showed that patients who received palliative care were significantly more likely to die in a hospice (39.4% versus 14.5%,  $p < 0.05$ ) and significantly less likely to die in hospital (23.3% versus 40.1%,  $p < 0.05$ ), at home (26.8% versus 31.8%,  $p < 0.05$ ), or in a care home (8.7% versus 12.0%,  $p < 0.05$ ) compared to patients who did not receive palliative care (Table 2).

For the 1598 decedents who received palliative care, a shorter time between first contact with palliative care and death was observed for hospital deaths (median 3 weeks palliative care) compared with deaths in hospice (median 7 week palliative care), at home (median 7 weeks palliative care) or in a care home (median 13 weeks palliative care) ( $p < 0.001$ ). There

was also a significant difference in the number of palliative care events by place of death ( $p < 0.001$ ), with the median number of palliative events in hospital equalling one event, compared with a median of two events for deaths at home, in a hospice, or in a care home (Table 2).

**Table 2 | Palliative care provision by place of death**

| Place of death   | Palliative care provision (n=2479) |             |          | Sub-group receiving palliative care (n = 1598) |          |                                                           |          |
|------------------|------------------------------------|-------------|----------|------------------------------------------------|----------|-----------------------------------------------------------|----------|
|                  | Not received                       | Received    | Post-hoc | Number of palliative events                    | Post-hoc | Time between first contact with palliative care and death | Post-hoc |
|                  | Number (%)                         | Number (%)  |          | Median (IQR)                                   |          | Median (IQR)                                              |          |
| Own home         | 280 (31.8)                         | 429 (26.8%) | <0.05    | 2 events (1,3)                                 | i        | 7 weeks (2.5,17)                                          | i,ii     |
| Hospice          | 128 (14.5)                         | 629 (39.4%) | <0.05    | 2 events (1,3)                                 | ii       | 7 weeks (3,19)                                            | iii,iv   |
| Hospital         | 353 (40.1)                         | 372 (23.3%) | <0.05    | 1 event (1,2)                                  | i,ii,iii | 3 weeks (1,14)                                            | i,iii,v  |
| Care home        | 106 (12.0)                         | 139 (8.7%)  | <0.05    | 2 events (1,3)                                 | iii      | 13 weeks (4,35)                                           | ii,iv,v  |
| Other            | 1 (0.1)                            | 0 (0.0%)    | -        | -                                              | -        | -                                                         | -        |
| Unknown          | 13 (1.5)                           | 29 (1.8%)   | -        | -                                              | -        | -                                                         | -        |
| Statistical test | $(\chi^2(3) = 180.52, p < 0.001)$  |             |          | $(K-W(3) = 128.14, p < 0.001)$                 |          | $(K-W(3) = 75.77, p < 0.001)$                             |          |

$\chi^2$ =Chi-squared (degrees of freedom shown in brackets); K-W = Kruskal-Wallis H test (degrees of freedom shown in brackets); Post-hoc = multiple comparison z-test statistics comparing mean ranks for each possible two category comparison group; i,ii,iii,iv,v links categories where post-hoc comparison groups which resulted in a p value less than 0.05 (after adjusting using the Bonferroni correction); IQR=Interquartile range

### Receiving at least one strong opioid prescription within the last year of life

Decedents who received palliative care were significantly more likely to have also been prescribed strong opioids before death compared with patients who did not receive palliative care (53.9% versus 25.2%,  $p < 0.001$ ).

For those decedents that received palliative care (n=1598), the time between first contact with palliative care and death and the number of palliative care events were significantly higher for decedents who received at least one strong opioid prescription (median 9 weeks palliative care versus 4 weeks palliative care,  $p < 0.001$ ; median 2 palliative care events versus 1 palliative care event,  $p < 0.001$ ) (Table 3).

**Table 3 | Palliative care provision by strong opioid prescription within the last twelve months of life**

| Strong opioid prescription within last year | Palliative care provision (n=2479) |          | Sub-group receiving palliative care (n = 1598) |                            |
|---------------------------------------------|------------------------------------|----------|------------------------------------------------|----------------------------|
|                                             | Not received                       | Received | Number of palliative                           | Time between first contact |

| of life          |                               |             | events with palliative care and death |                         |
|------------------|-------------------------------|-------------|---------------------------------------|-------------------------|
|                  | Number (%)                    | Number (%)  | Median (IQR)                          | Median (IQR)            |
| Yes              | 222 (25.2%)                   | 862 (53.9%) | 2 events (1,4)                        | 9 weeks (3,26)          |
| No               | 655 (74.3%)                   | 736 (46.1%) | 1 events (1,2)                        | 4 weeks (1,12)          |
| Missing          | 4 (0.5%)                      | 0 (0.0%)    |                                       |                         |
| Statistical test | $(\chi^2(1)=188.54, p<0.001)$ |             | $(M-W=226447, <0.001)$                | $(M-W=233259, p<0.001)$ |

$\chi^2$ =Chi-squared (degrees of freedom shown in brackets); M-W = Mann-Whitney U test; IQR=Interquartile range

### Timing of last chemotherapy

A significant relationship was identified between timing of last chemotherapy and receiving palliative care ( $p<0.001$ ). Post-hoc analysis showed that those who received palliative care were more likely to have been treated with chemotherapy at any point during the course of their disease (63.6% versus 47.4%,  $P<0.05$ ) and were more likely to have stopped chemotherapy over four weeks before death, compared with those not receiving palliative care (58.5% versus 42.1%,  $p<0.05$ ).

For patients who received palliative care ( $n=1598$ ) the time between first contact with palliative care and death was significantly associated with the timing of latest chemotherapy ( $p<0.001$ ) (Table 4).

**Table 4 | Palliative care provision by timing of latest chemotherapy**

| Time of latest chemotherapy | Palliative care provision (n=2479) |             |          | Sub-group receiving palliative care (n = 1598) |            |                                                           |          |
|-----------------------------|------------------------------------|-------------|----------|------------------------------------------------|------------|-----------------------------------------------------------|----------|
|                             | Not received                       | Received    | Post-hoc | Number of palliative events                    |            | Time between first contact with palliative care and death |          |
|                             |                                    |             |          | Number (%)                                     | Number (%) | Median (IQR)                                              | Post-hoc |
| No chemotherapy             | 463 (52.6%)                        | 582 (36.4%) | <0.05    | 2 events (1,3)                                 | i          | 5 weeks (2,14)                                            | i,ii     |
| 0-4 weeks                   | 47 (5.3%)                          | 82 (5.1%)   | n/s      | 1 events (1,2)                                 | i,ii       | 2 weeks (1,6)                                             | i,iii    |
| Over 4 weeks                | 371 (42.1%)                        | 934 (58.5%) | <0.05    | 2 events (1,3)                                 | ii         | 8 weeks (2,22)                                            | ii,iii   |
| Statistical test            | $(\chi^2(2)=63.90, p<0.001)$       |             |          | $(K-W(2)=19.94, p<0.001)$                      |            | $(K-W(2)=46.58, p<0.001)$                                 |          |

$\chi^2$ =Chi-squared (degrees of freedom shown in brackets); K-W = Kruskal-Wallis H test (degrees of freedom shown in brackets); Post-hoc = multiple comparison z-test statistics comparing mean ranks for each possible two category comparison group; i,ii,iii,iv,v links categories where post-hoc comparison groups which resulted in a p value less than 0.05 (after adjusting using the Bonferroni correction); IQR=Interquartile range; n/s=Not significant

### Emergency hospital admission within the last four weeks of life

The majority of the sample (1926 out of 2479, 77.7%) avoided emergency hospital admission in the last 4 weeks of life. A borderline significant association was identified between emergency hospital admissions in the last four weeks of life and receiving palliative care ( $p=0.049$ ). For decedents who received palliative care ( $n=1598$ ), emergency admission was associated with a significantly shorter time between first contact with palliative care

and death (4 weeks versus 7 weeks,  $p<0.001$ ) and significantly fewer palliative care events overall (2 events versus 2 events,  $p=0.010$ ) (Table 5).

**Table 5 | Palliative care provision by emergency hospital admissions within the last four weeks of life**

| Avoided emergency hospital admissions 0-4 weeks before death | Palliative care provision (n=2479) |                        | Sub-group receiving palliative care (n = 1598) |                                                                           |
|--------------------------------------------------------------|------------------------------------|------------------------|------------------------------------------------|---------------------------------------------------------------------------|
|                                                              | Not received<br>Number (%)         | Received<br>Number (%) | Number of palliative events<br>Median (IQR)    | Time between first contact with palliative care and death<br>Median (IQR) |
| Yes                                                          | 704 (79.9%)                        | 1222 (76.5%)           | 2 events (1,3)                                 | 7 weeks (2,20)                                                            |
| No (one or more admission)                                   | 177 (20.1%)                        | 376 (23.5%)            | 2 events (1,3)                                 | 4 weeks (1,12)                                                            |
| <i>Statistical test</i>                                      | $(\chi^2(1)=3.87, p=0.049)$        |                        | $(M-W=210485, p=0.010)$                        | $(M-W=185814, p<0.001)$                                                   |

$\chi^2$ =Chi-squared (degrees of freedom shown in brackets); M-W = Mann-Whitney U test; IQR=Interquartile range

### Multivariable regression

Classification tree optimum cut-off points for each of the end of life outcomes are provided in appendix 3. Between three and five optimum cut-off points were identified for the four end of life outcomes in relation to the time between first contact with palliative care and death. The multivariable (multinomial) logistic regression models, showed overall greater odds ratios for better outcomes at the end of life with longer time between first contact with palliative care and death Figure 1. Each cut-off point within the model generally represents a significantly better outcome. For example, although overall there was no association between palliative care and increased home deaths, the model shows that decedents who received 2-7 weeks of palliative care had 2.96 better odds of dying at home than in hospital (95% CI= 2.02 to 4.35,  $p<0.001$ ), and those who received more than 8 weeks of palliative care had 3.49 better odds of dying at home (95% CI= 2.42 to 5.04,  $p<0.001$ ). Similarly, there was a clear stepwise increase in the odds of receiving an opioid prescription with longer time between first contact with palliative care and death (Not received palliative care: OR=0.49, 95% CI=0.39 to 0.61,  $p<0.001$ ; 0-3 weeks palliative care: OR=1.00 95% CI=reference; 4-7 weeks palliative care: OR=1.49, 95% CI=1.12 to 1.98,  $p=0.006$ ; 8-32 weeks palliative care: OR=2.45, 95% CI=1.90 to 3.16,  $p<0.001$ ; 33+ weeks palliative care: OR=3.24, 95% CI=2.34 to 4.49,  $p<0.001$ ).

(Insert Fig 1 here)



## Discussion

Our analysis confirms existing research that better outcomes at the end of life are associated with access to palliative care services. However, we have been able to demonstrate for the first time that longer interval between first contact with palliative care and death is associated with increasingly better outcomes, specifically relating to place of death outside hospital, access to strong opioid<sup>19</sup>, and avoiding chemotherapy and emergency hospital admission within the last 4 weeks of life. For some outcomes such as place of death at home, there appears to be a minimum interval between first contact with palliative care and death that is associated with higher odds of home death. This suggests that sufficient time is required to plan and co-ordinate in order to achieve this outcome for a patient.

We found decedents who received palliative care were less likely to die in hospital and more likely to die in a hospice. Whilst it is important to acknowledge that for some patients dying in hospital represents appropriate end of life care, for most, care is rated significantly lower for people who die in a hospital, compared to home, a hospice or care home.<sup>20</sup> Despite this, approximately 48% of UK cancer patients die in hospital.<sup>21</sup> We identified the level of palliative care involvement associated with a reduction in hospital deaths was minimal (two contacts initiated at least three weeks before death). The potential per patient saving by avoiding a hospital death proposed by the National End of Life Information Network is £958 per patient.<sup>22</sup>

Evidence for the impact of palliative care on home death is inconsistent. We found the rate of home deaths in decedents who received palliative care was lower compared to those who did not, however the likelihood of dying at home, rather than hospital, increased as the level of palliative care involvement increased. A meta-analysis found palliative care had no impact on home deaths<sup>23</sup> while a Cochrane review undertaken the same year found it more than doubles the odds of dying at home.<sup>24</sup> These differences may reflect differences in the availability of hospice or palliative care services, or bias in the selection of suitable patients

1  
2  
3 for palliative care. Our data suggest that the interval between first contact with palliative  
4 care and death may account for this inconsistent relationship.  
5

6  
7 Opioid analgesia is the recommended treatment for moderate to severe pain<sup>25</sup> the  
8 prevalence of which in advanced cancer is estimated to be between 62% and 86%<sup>26</sup> and  
9 patients who die of cancer typically require increasing doses of opioids as their disease  
10 progresses.<sup>27</sup> We found access to palliative care was associated with being twice as likely to  
11 have access to strong opioids. However whether the referral to palliative care triggers the  
12 opioid prescription or the opioid prescription triggers the palliative care referral is unclear.  
13  
14

15  
16 Administration of chemotherapy close to death usually represents poorly planned care.<sup>28</sup> It  
17 was encouraging to find that only 5% of our study population received chemotherapy within  
18 the last four weeks of life however this limited the potential to explore the impact of  
19 palliative care on late chemotherapy. Studies that have established an association between  
20 palliative care team involvement and lower rates of chemotherapy near the end of life have  
21 concluded that cessation of chemotherapy is due to palliative care involvement.<sup>29</sup> Although  
22 a referral to palliative care may help protect against late chemotherapy, our findings suggest  
23 this association is more complex and in some cases receiving chemotherapy or the cessation  
24 of chemotherapy may in fact trigger the palliative care referral.  
25  
26  
27  
28  
29  
30  
31  
32

33 We hypothesised that decedents who received palliative care would be more likely to avoid  
34 emergency hospital admissions in the last four weeks of life though we found the opposite.  
35 Further analysis revealed that only decedents in whom first contact with palliative care was  
36 longer than four weeks before death benefited in this outcome. Decedents whose first  
37 contact occurred less than four weeks before death were more likely to require emergency  
38 admission within the last four weeks of life. This might be explained by emergency hospital  
39 admission triggering palliative care involvement. Current evidence reports that 77% of  
40 emergency cancer admissions are avoidable<sup>30</sup> so our findings indicate there is considerable  
41 scope to reduce emergency admissions provided palliative care is initiated at least 4 weeks  
42 before death  
43  
44  
45  
46  
47  
48  
49  
50

51 This study has limitations. First, the population is derived from a single UK city. Though  
52 broadly representative of the UK cancer population in prevalence of cancer type, age, sex,  
53 and survival, the extent to which the level of palliative care involvement is representative of  
54 national and international activity is harder to determine. Secondly, the data are derived  
55  
56  
57

1  
2  
3 from a live clinical system and as such are likely to represent errors or omissions inherent  
4 within the system. This was moderated by restricting linkage to a single electronic system  
5 (SystemOne) which had the best potential for reliable linkage. We were unable to include  
6 data on prevalence and severity of specific symptoms and underlying disease (especially at  
7 time of any referral to palliative care) as these are not routinely coded in UK health data. It  
8 cannot be assumed therefore that referral to or longer interval between first contact with  
9 palliative care and death caused better outcomes. However, for all patients within our study  
10 population, the decision as to whether they received palliative care was made on rigorously  
11 applied eligibility criteria.<sup>31</sup> This provides greater confidence in asserting that most if not all  
12 of the 65% of patients in our cohort who were referred to palliative care had active,  
13 progressive advanced disease and a high symptom burden, and that most if not all of the  
14 35% of patients who did not receive palliative care had stable inactive disease. It is therefore  
15 unlikely lower symptom burden or disease severity among the palliative care population  
16 explains more than a very small component of our observed results.  
17  
18  
19  
20  
21  
22  
23  
24  
25  
26

27 For some patients, and for some outcomes (such as access to strong opioids or cessation of  
28 chemotherapy), it is possible that the outcome event itself triggered referral to palliative  
29 care. These are nevertheless important hypotheses to test further in terms of  
30 operationalising earlier integration of palliative care. In contrast, deaths outside hospital  
31 and increased home death appear more likely to be the result of longer interval from first  
32 contact with palliative care.  
33  
34  
35  
36  
37  
38  
39  
40

## 41 **Conclusion**

42  
43 The research evidence to support early integration of palliative care for cancer patients<sup>1-6</sup> is  
44 based on relatively high intensity interventions of at least 8–12 weeks initiated  
45 approximately 6–14 months before death. Within routinely collected data, we have  
46 determined an association between longer interval from first contact with palliative care to  
47 death and important quality indicators of end of life care. Palliative care initiated more than  
48 two weeks before death was associated with avoiding a hospital death; and initiated more  
49 than four weeks before death was associated with a reduction in emergency hospital  
50 admissions and an increased likelihood of receiving an opioid analgesic. Palliative care  
51  
52  
53  
54  
55  
56  
57

1  
2  
3 initiated more than 32 weeks before death was associated with a reduction in  
4 chemotherapy in the last four weeks of life.  
5

6  
7 Characterising the impact of palliative care services based on interval between first contact  
8 and death provides new evidence which will aid policymakers when modelling palliative  
9 care service provision. Evidence of benefit in advanced non-cancer diseases remains unclear  
10 but together with other observational evidence, our findings should stimulate similar  
11 research in these populations.  
12  
13  
14  
15  
16  
17  
18  
19  
20  
21  
22  
23  
24  
25  
26  
27  
28  
29  
30  
31  
32  
33  
34  
35  
36  
37  
38  
39  
40  
41  
42  
43  
44  
45  
46  
47  
48  
49  
50  
51  
52  
53  
54  
55  
56  
57

## Contributors

Conception and design: Lucy E Ziegler, Robert M West, Geoff Hall, Paul Carder, Adam Hurlow, Pablo Millares-Martin, Michael I Bennett

Collection and assembly of data: Lucy E Ziegler, Cheryl L Craigs

Data analysis and interpretation: Lucy E Ziegler, Cheryl L Craigs, Robert M West, Michael I Bennett

Manuscript writing: All authors

Final approval of manuscript: All authors

Accountable for all aspects of the work: All authors

## Funding

This study was funded by Yorkshire Cancer Research (Award L384). The views expressed in this report are those of the authors and do not necessarily represent those of Yorkshire Cancer Research. The funders had no role in the study design, data collection, data analysis, data interpretation, or writing of the report.

## Competing interests

We have read and understood BMJ policy on declaration of interests and declare that we have no competing interests.

## Ethical approval

The National Research Ethics Service (PR 13.YH.0301) granted ethical approval for the study.

## Acknowledgements

The authors would like to acknowledge the key role of Professor Rick Jones who advised on the data linkage process for this study, and Chris Jackson for his role in constructing the searches and accessing the data.

## Data Sharing

No additional data available. Electronic health records are considered “sensitive” data in the UK by the Data Protection Act and cannot be shared via public deposition due to restrictions in place to protect patient confidentiality.

## Transparency statement

The lead author affirms that the manuscript is an honest, accurate, and transparent account of the study being reported; that no important aspects of the study have been omitted; and that any discrepancies are disclosed.

## Legend for Fig 1

Fig 1 | Multivariable adjusted odds ratios from logistic and multinomial logistic regression models for end of life outcomes by time between first contact with palliative care and death cut-off points

## References

1. Smith TJ, Temin S, Alesi ER, et al: American Society of Clinical Oncology provisional clinical opinion: the integration of palliative care into standard oncology care. *J Clin Oncol* 30:880-7, 2012
2. Rugno FC, Paiva BS, Paiva CE: Early integration of palliative care facilitates the discontinuation of anticancer treatment in women with advanced breast or gynecologic cancers. *Gynecol Oncol* 135:249-54, 2014
3. Bakitas MA, Tosteson TD, Li Z, et al: Early Versus Delayed Initiation of Concurrent Palliative Oncology Care: Patient Outcomes in the ENABLE III Randomized Controlled Trial. *J Clin Oncol* 33:1438-45, 2015
4. Greer JA, Jackson VA, Meier DE, et al: Early integration of palliative care services with standard oncology care for patients with advanced cancer. *CA Cancer J Clin* 63:349-63, 2013
5. Temel JS, Greer JA, Muzikansky A, et al: Early palliative care for patients with metastatic non-small-cell lung cancer. *N Engl J Med* 363:733-42, 2010
6. Zimmermann C, Swami N, Krzyzanowska M, et al: Early palliative care for patients with advanced cancer: a cluster-randomised controlled trial. *Lancet* 383:1721-30, 2014
7. Osta BE, Palmer JL, Paraskevopoulos T, et al: Interval between first palliative care consult and death in patients diagnosed with advanced cancer at a comprehensive cancer center. *J Palliat Med* 11:51-7, 2008
8. Bennett MI, Ziegler L, Allsop M, et al: What determines duration of palliative care before death for patients with advanced disease? A retrospective cohort study of community and hospital palliative care provision in a large UK city. *BMJ Open* Accepted November 2016, 2016
9. Henson L, Gao W, Higginson I, et al: Emergency department attendance by patients with cancer in the last month of life: a systematic review and meta-analysis. *Lancet* 385 Suppl 1:S41, 2015

- 1  
2  
3 10. Seow H, Brazil K, Sussman J, et al: Impact of community based, specialist  
4 palliative care teams on hospitalisations and emergency department visits late in life and  
5 hospital deaths: a pooled analysis. *Bmj* 348:g3496, 2014  
6  
7
- 8 11. Blackhall LJ, Read P, Stukenborg G, et al: CARE Track for Advanced Cancer:  
9 Impact and Timing of an Outpatient Palliative Care Clinic. *J Palliat Med* 19:57-63, 2016  
10  
11
- 12 12. Bharadwaj P, Helfen KM, Deleon LJ, et al: Making the Case for Palliative Care  
13 at the System Level: Outcomes Data. *J Palliat Med* 19:255-8, 2016  
14  
15
- 16 13. National Council of Palliative Care: Commissioning Guidance for Specialist  
17 Palliative Care: Helping to deliver commissioning objectives, December 2012, Guidance  
18 document published collaboratively with the association for Palliative Medicine of Great  
19 Britain and Ireland, Consultant nurse in palliative care reference group, Marie Curie Cancer  
20 Care, National Council for palliative Care and Palliative care Section of the Royal Society of  
21 Medicine. London UK, 2012  
22  
23  
24  
25  
26
- 27 14. Department of Health: End of Life Care Strategy – promoting high quality care  
28 for all adults at the end of life. London Central Office of Information, Crown, 2008  
29  
30
- 31 15. National Institute for Health and Care Excellence: Quality Standard for end of  
32 life care for adults, End of life care (ed Issued August 2011 last modified October 2013).  
33 London, UK, 2011  
34  
35  
36
- 37 16. Ziegler L, Mulvey M, Blenkinsopp A, et al: Opioid prescribing for patients with  
38 cancer in the last year of life: a longitudinal population cohort study. *Pain* 157:2445-2451,  
39 2016  
40  
41
- 42 17. Dunn OJ: Multiple comparisons using rank sums. *Technometrics* 6:241-252,  
43 1964  
44  
45
- 46 18. Copolov D, Singh B: Constructing a minimal diagnostic decision tree. *Meth*  
47 *Inform Med* 32:161-6, 1993  
48  
49
- 50 19. National Institute of Clinical Excellence: Safe and Effective Prescribing of  
51 Strong opioids in palliative care of adults. . London, Uk National Institute of Clinical  
52 Excellence,, 2011  
53  
54  
55  
56  
57



1  
2  
3           20.     Office for National Statistics: Statistical Bulletin: National Survey of Bereaved  
4 People (VOICES): England 2015, ONS, 2016  
5

6           21.     Gao W, Ho YK, Verne J, et al: Changing patterns in place of cancer death in  
7 England: a population-based study. PLoS Med 10:e1001410, 2013  
8  
9

10           22.     Dixon J, King D, Matosevic T, et al: Equity in the Provision of Palliative Care in  
11 the UK; review of Evidence   PSSRU Discussion Paper 2894. London London School of  
12 Economics 2015  
13  
14

15           23.     Lockett T, Davidson PM, Lam L, et al: Do community specialist palliative care  
16 services that provide home nursing increase rates of home death for people with life-  
17 limiting illnesses? A systematic review and meta-analysis of comparative studies. J Pain  
18 Symptom Manage 45:279-97, 2013  
19  
20  
21

22           24.     Gomes B, Calanzani N, Curiale V, et al: Effectiveness and cost-effectiveness of  
23 home palliative care services for adults with advanced illness and their caregivers. Cochrane  
24 Database Syst Rev:Cd007760, 2013  
25  
26  
27

28           25.     National Institute for Health and Clinical Excellence: Safe and Effective  
29 Prescribing of Strong Opioids for Pain in Palliative Care of Adults, Opioids in Palliative Care:  
30 NICE Clinical guideline No.140 Cardiff (UK), National Collaborating Centre for Cancer, 2012  
31  
32  
33

34           26. Gagnon, B, Scott S, Nadeau L, Lawlor P. Patterns of Community Based opioid  
35 Prescriptions in people Dying of Cancer. Journal of Pain and Symptom Management Vol 49  
36 No.1 2015  
37  
38  
39

40           27. van den Beuken-van Everdingen MH, de Rijke JM, Kessels AG, et al: Prevalence of  
41 pain in patients with cancer: a systematic review of the past 40 years. Ann Oncol 18:1437-  
42 49, 2007  
43  
44  
45

46           28.     Pirl WF, Greer JA, Irwin K, et al: Processes of discontinuing chemotherapy for  
47 metastatic non-small-cell lung cancer at the end of life. J Oncol Pract 11:e405-12, 2015  
48  
49

50           29.     Karim SM, Zekri J, Abdelghany E, et al: Time from last chemotherapy to death  
51 and its correlation with the end of life care in a referral hospital. Indian J Med Paediatr  
52 Oncol 36:55-9, 2015  
53  
54  
55

1  
2  
3 30. Delgado-Guay MO, Kim YJ, Shin SH, et al: Avoidable and unavoidable visits to  
4 the emergency department among patients with advanced cancer receiving outpatient  
5 palliative care. J Pain Symptom Manage 49:497-504, 2015  
6  
7

8 31. Bennett MI, Adam J, Alison D, Hicks F, et al. Leeds eligibility criteria for  
9 specialist palliative care services. Palliative Med 2000 14: 157  
10  
11  
12  
13  
14  
15  
16  
17  
18  
19  
20  
21  
22  
23  
24  
25  
26  
27  
28  
29  
30  
31  
32  
33  
34  
35  
36  
37  
38  
39  
40  
41  
42  
43  
44  
45  
46  
47  
48  
49  
50  
51  
52  
53  
54  
55  
56  
57

For peer review only

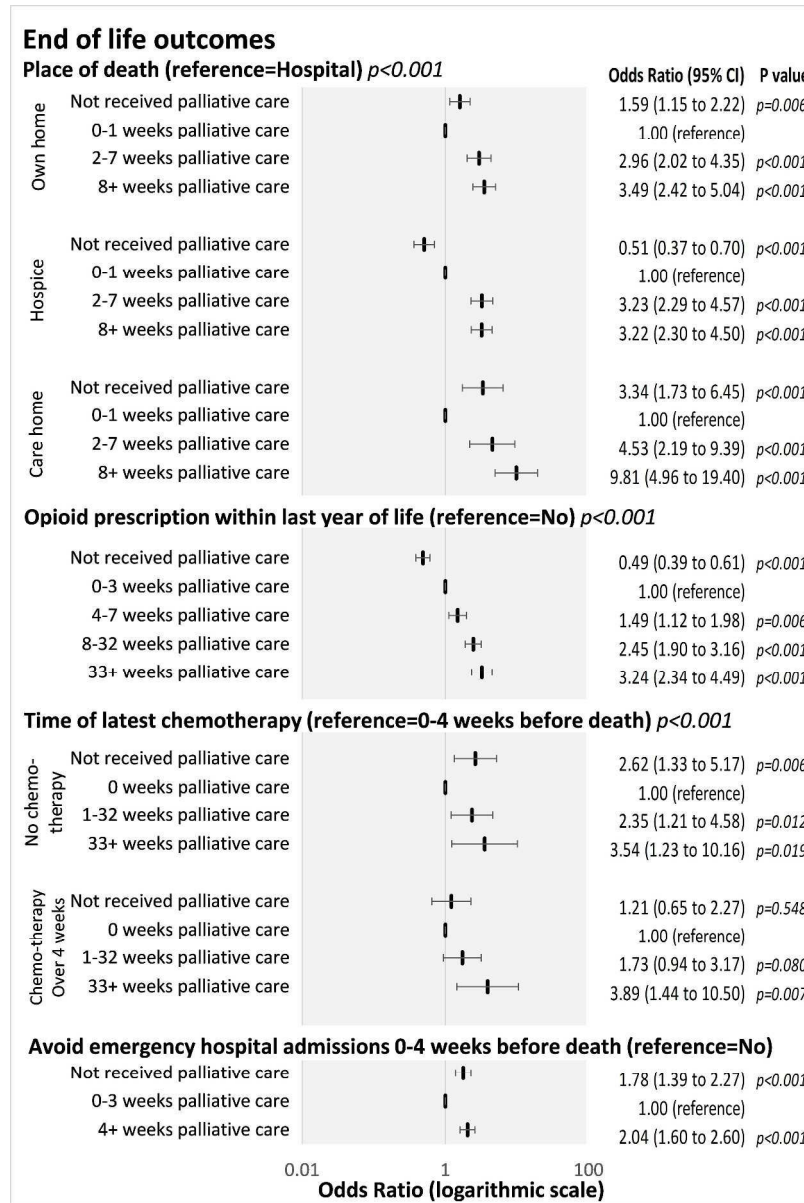

Figure 1

343x512mm (300 x 300 DPI)

## Appendix 1: READ codes extracted from SystemOne

| READ codes                                                    | Indicate active palliative care? |
|---------------------------------------------------------------|----------------------------------|
| (1Z01.) Terminal illness - late stage                         | No                               |
| (8BA2.) End of life care                                      | No                               |
| (8H6A.) Refer to terminal care consult                        | Yes                              |
| (8H7L.) Refer for terminal care                               | Yes                              |
| (9EB5.) DS 1500 Disability living allowance completed         | No                               |
| (Xa9tS) For resuscitation                                     | No                               |
| (Xa9tT) Not for resuscitation                                 | No                               |
| (XaAex) Referral to palliative care service                   | Yes                              |
| (XaAg6) Referral to palliative care physician                 | Yes                              |
| (XaAPW) Under care of palliative care physician               | Yes                              |
| (XaAT5) Seen by palliative care physician                     | Yes                              |
| (XaAWN) Seen by palliative care medicine - service            | Yes                              |
| (XaEJE) Palliative care                                       | No                               |
| (XaIlk) Referred to community specialist palliative care team | Yes                              |
| (XaIpI) Palliative treatment                                  | Yes                              |
| (XaIpI) Final days pathway                                    | No                               |
| (XaIpX) Preferred place of death                              | No                               |
| (Xalse) Specialist palliative care treatment                  | Yes                              |
| (Xalsy) Preferred place of death discussed with patient       | No                               |
| (Xalt6) Specialist palliative care treatment – day care       | Yes                              |
| (Xalt7) Specialist palliative care treatment - outpatient     | Yes                              |
| (XaJ3g) Preferred place of death: home                        | No                               |
| (XaJ3h) Preferred place of death: hospice                     | No                               |
| (XaJ3j) Preferred place of death: hospital                    | No                               |
| (XaJ3k) Preferred place of death: nursing home                | No                               |

|    |                                                              |    |
|----|--------------------------------------------------------------|----|
| 1  |                                                              |    |
| 2  |                                                              |    |
| 3  | (XaJv2) On gold standards palliative care framework          | No |
| 4  |                                                              |    |
| 5  | (XaLwc) Resuscitation discussed with patient                 | No |
| 6  |                                                              |    |
| 7  | (XaLwd) Resuscitation discussed with carer                   | No |
| 8  |                                                              |    |
| 9  | (XaMhi) Liverpool care pathway for the dying                 | No |
| 10 |                                                              |    |
| 11 | (XaPmq) Issue of palliative care anticipatory medication box | No |
| 12 |                                                              |    |
| 13 | (XaQ8S) Anticipatory palliative care                         | No |
| 14 |                                                              |    |
| 15 | (XaQg1) Last days of life                                    | No |
| 16 |                                                              |    |
| 17 | (XaQzq) Preferred place of death: pt unable to express       | No |
| 18 |                                                              |    |
| 19 | preference                                                   |    |
| 20 |                                                              |    |
| 21 | (XaQzr) Preferred place of death: discussion not appropriate | No |
| 22 |                                                              |    |
| 23 | (XaQzt) Preferred place of death: patient undecided          | No |
| 24 |                                                              |    |
| 25 | (XaR50) GSF supportive care stage 1 - advancing disease      | No |
| 26 |                                                              |    |
| 27 | (XaR53) GSF supportive care stage 2 - increasing decline     | No |
| 28 |                                                              |    |
| 29 | (XaR5A) GSF supportv care stge 3 - last days: cat C - wks    | No |
| 30 |                                                              |    |
| 31 | prognosis                                                    |    |
| 32 |                                                              |    |
| 33 | (XaRFF) Has end of life advance care plan                    | No |
| 34 |                                                              |    |
| 35 | (XaRFG) On end of life care register                         | No |
| 36 |                                                              |    |
| 37 | (XaX46) GSF supportv care stge 3 - last days: cat B - mth    | No |
| 38 |                                                              |    |
| 39 | prognosis                                                    |    |
| 40 |                                                              |    |
| 41 | (ZV57C) [V]Palliative care                                   | No |
| 42 |                                                              |    |
| 43 |                                                              |    |
| 44 |                                                              |    |
| 45 |                                                              |    |
| 46 |                                                              |    |
| 47 |                                                              |    |
| 48 |                                                              |    |
| 49 |                                                              |    |
| 50 |                                                              |    |
| 51 |                                                              |    |
| 52 |                                                              |    |
| 53 |                                                              |    |
| 54 |                                                              |    |
| 55 |                                                              |    |
| 56 |                                                              |    |
| 57 |                                                              |    |
| 58 |                                                              |    |
| 59 |                                                              |    |
| 60 |                                                              |    |

**Appendix 2. Medications identified as strong opioids**

- Buprenorphine (>10mcg)
- Diamorphine
- Dipipanone (with cyclizine)
- Fentanyl
- Hydromorphone
- Meptazinol
- Morphine
- Oxycodone
- Pentazocine
- Papaveretum
- Pethidine

For peer review only

### Appendix 3: Classification tree duration of palliative care cut-off points by end of life quality outcomes

#### Place of death

|                              | Cut-off points (n=2436): number (column %) |                    |                    |                    | Total                         |
|------------------------------|--------------------------------------------|--------------------|--------------------|--------------------|-------------------------------|
|                              | Not received                               | 0-1 weeks          | 2-7 weeks          | 8+ weeks           |                               |
| Own home                     | 280 (32.3%)                                | 70 (21.1%)         | 148 (28.1%)        | 211 (29.7%)        | 709 (29.1%)                   |
| Hospice                      | 128 (14.8%)                                | 104 (31.4%)        | 237 (45.0%)        | 288 (40.5%)        | 757 (31.1%)                   |
| Hospital                     | 353 (40.7%)                                | 146 (44.1%)        | 105 (19.9%)        | 121 (17.0%)        | 725 (29.8%)                   |
| Care home                    | 106 (12.2%)                                | 11 (3.3%)          | 37 (7.0%)          | 91 (12.8%)         | 245 (10.1%)                   |
| <i>Statistical test</i>      |                                            |                    |                    |                    | $(\chi^2(9)=280.75, p<0.001)$ |
| <b>Total: Number (row %)</b> | <b>867 (35.6%)</b>                         | <b>331 (13.6%)</b> | <b>527 (21.6%)</b> | <b>711 (29.2%)</b> | <b>2436</b>                   |

#### Opioid prescription within last year of life

|                              | Cut-off points (n=2475): number (column %) |                    |                    |                    |                    | Total                         |
|------------------------------|--------------------------------------------|--------------------|--------------------|--------------------|--------------------|-------------------------------|
|                              | Not received                               | 0-3 weeks          | 4-7 weeks          | 8-32 weeks         | 33+ weeks          |                               |
| Yes                          | 222 (25.3%)                                | 237 (41.3%)        | 149 (50.0%)        | 299 (62.8%)        | 177 (70.8%)        | 1084 (43.8%)                  |
| No                           | 655 (74.7%)                                | 337 (58.7%)        | 149 (50.0%)        | 177 (37.2%)        | 73 (29.2%)         | 1391 (56.2%)                  |
| <i>Statistical test</i>      |                                            |                    |                    |                    |                    | $(\chi^2(4)=279.01, p<0.001)$ |
| <b>Total: Number (row %)</b> | <b>877 (35.4%)</b>                         | <b>574 (23.2%)</b> | <b>298 (12.0%)</b> | <b>476 (19.2%)</b> | <b>250 (10.1%)</b> | <b>2475</b>                   |

#### Time of latest chemotherapy

|                              | Cut-off points (n=2479): number (column %) |                   |                     |                    | Total                         |
|------------------------------|--------------------------------------------|-------------------|---------------------|--------------------|-------------------------------|
|                              | Not received                               | 0 weeks           | 1-32 weeks          | 33+ weeks          |                               |
| No chemotherapy              | 463 (52.6%)                                | 50 (30.7%)        | 466 (39.4%)         | 66 (26.4%)         | 1045 (42.2%)                  |
| 0-4 weeks                    | 47 (5.3%)                                  | 16 (9.8%)         | 60 (5.1%)           | 6 (2.4%)           | 129 (5.2%)                    |
| 5+ weeks                     | 371 (42.1%)                                | 97 (59.5%)        | 659 (55.6%)         | 178 (71.2%)        | 1305 (52.6%)                  |
| <i>Statistical test</i>      |                                            |                   |                     |                    | $(\chi^2(3)=55.494, p<0.001)$ |
| <b>Total: Number (row %)</b> | <b>881 (35.5%)</b>                         | <b>163 (6.6%)</b> | <b>1185 (47.8%)</b> | <b>250 (10.1%)</b> | <b>2479</b>                   |

#### Avoided emergency hospital admissions 0-4 weeks before death

|                              | Cut-off points (n=2479): number (column %) |                    |                     | Total                         |
|------------------------------|--------------------------------------------|--------------------|---------------------|-------------------------------|
|                              | Not received                               | 0-3 weeks          | 4+ weeks            |                               |
| Yes                          | 704 (79.9%)                                | 392 (68.3%)        | 830 (81.1%)         | 1926 (77.7%)                  |
| No (one or more admission)   | 177 (20.1%)                                | 182 (31.7%)        | 194 (18.9%)         | 553 (22.3%)                   |
| <i>Statistical test</i>      |                                            |                    |                     | $(\chi^2(2)=36.390, p<0.001)$ |
| <b>Total: Number (row %)</b> | <b>881 (35.5%)</b>                         | <b>574 (23.2%)</b> | <b>1024 (41.3%)</b> | <b>2479</b>                   |
