# Supplementary material for: Is palliative care support associated with better quality end-of-life care indicators for patients with advanced cancer? A retrospective cohort study
Source: PubMed Central journal article supplement — BMJ Open. 2018 Jan 31;8(1):e018284. doi: 10.1136/bmjopen-2017-018284 (PMC5829853; doi:10.1136/bmjopen-2017-018284), 2018-01-31
Supplement: bmjopen-2017-018284supp001.pdf [file bmjopen-2017-018284supp001.pdf]

## Appendix 1: READ codes extracted from SystemOne

| READ codes                                                    | Indicate active palliative care? |
|---------------------------------------------------------------|----------------------------------|
| (1Z01.) Terminal illness - late stage                         | No                               |
| (8BA2.) End of life care                                      | No                               |
| (8H6A.) Refer to terminal care consult                        | Yes                              |
| (8H7L.) Refer for terminal care                               | Yes                              |
| (9EB5.) DS 1500 Disability living allowance completed         | No                               |
| (Xa9tS) For resuscitation                                     | No                               |
| (Xa9tT) Not for resuscitation                                 | No                               |
| (XaAex) Referral to palliative care service                   | Yes                              |
| (XaAg6) Referral to palliative care physician                 | Yes                              |
| (XaAPW) Under care of palliative care physician               | Yes                              |
| (XaAT5) Seen by palliative care physician                     | Yes                              |
| (XaAWN) Seen by palliative care medicine - service            | Yes                              |
| (XaEJE) Palliative care                                       | No                               |
| (XaIlk) Referred to community specialist palliative care team | Yes                              |
| (XaIpl) Palliative treatment                                  | Yes                              |
| (XaIpl) Final days pathway                                    | No                               |
| (XaIpX) Preferred place of death                              | No                               |
| (Xalse) Specialist palliative care treatment                  | Yes                              |
| (Xalsy) Preferred place of death discussed with patient       | No                               |
| (Xalt6) Specialist palliative care treatment – day care       | Yes                              |
| (Xalt7) Specialist palliative care treatment - outpatient     | Yes                              |
| (XaJ3g) Preferred place of death: home                        | No                               |
| (XaJ3h) Preferred place of death: hospice                     | No                               |
| (XaJ3j) Preferred place of death: hospital                    | No                               |
| (XaJ3k) Preferred place of death: nursing home                | No                               |

|                                                                     |    |
|---------------------------------------------------------------------|----|
| (XaJv2) On gold standards palliative care framework                 | No |
| (XaLwc) Resuscitation discussed with patient                        | No |
| (XaLwd) Resuscitation discussed with carer                          | No |
| (XaMhi) Liverpool care pathway for the dying                        | No |
| (XaPmq) Issue of palliative care anticipatory medication box        | No |
| (XaQ8S) Anticipatory palliative care                                | No |
| (XaQg1) Last days of life                                           | No |
| (XaQzq) Preferred place of death: pt unable to express preference   | No |
| (XaQzr) Preferred place of death: discussion not appropriate        | No |
| (XaQzt) Preferred place of death: patient undecided                 | No |
| (XaR50) GSF supportive care stage 1 - advancing disease             | No |
| (XaR53) GSF supportive care stage 2 - increasing decline            | No |
| (XaR5A) GSF supportv care stge 3 - last days: cat C - wks prognosis | No |
| (XaRFF) Has end of life advance care plan                           | No |
| (XaRFG) On end of life care register                                | No |
| (XaX46) GSF supportv care stge 3 - last days: cat B - mth prognosis | No |
| (ZV57C) [V]Palliative care                                          | No |

## **Appendix 2. Medications identified as strong opioids**

- Buprenorphine (>10mcg)
- Diamorphine
- Dipipanone (with cyclizine)
- Fentanyl
- Hydromorphone
- Meptazinol
- Morphine
- Oxycodone
- Pentazocine
- Papaveretum
- Pethidine

### Appendix 3: Classification tree duration of palliative care cut-off points by end of life quality outcomes

#### Place of death

|                              | Cut-off points (n=2436): number (column %) |                    |                    |                    | Total                         |
|------------------------------|--------------------------------------------|--------------------|--------------------|--------------------|-------------------------------|
|                              | Not received                               | 0-1 weeks          | 2-7 weeks          | 8+ weeks           |                               |
| Own home                     | 280 (32.3%)                                | 70 (21.1%)         | 148 (28.1%)        | 211 (29.7%)        | 709 (29.1%)                   |
| Hospice                      | 128 (14.8%)                                | 104 (31.4%)        | 237 (45.0%)        | 288 (40.5%)        | 757 (31.1%)                   |
| Hospital                     | 353 (40.7%)                                | 146 (44.1%)        | 105 (19.9%)        | 121 (17.0%)        | 725 (29.8%)                   |
| Care home                    | 106 (12.2%)                                | 11 (3.3%)          | 37 (7.0%)          | 91 (12.8%)         | 245 (10.1%)                   |
| <i>Statistical test</i>      |                                            |                    |                    |                    | $(\chi^2(9)=280.75, p<0.001)$ |
| <b>Total: Number (row %)</b> | <b>867 (35.6%)</b>                         | <b>331 (13.6%)</b> | <b>527 (21.6%)</b> | <b>711 (29.2%)</b> | <b>2436</b>                   |

#### Opioid prescription within last year of life

|                              | Cut-off points (n=2475): number (column %) |                    |                    |                    |                               | Total        |
|------------------------------|--------------------------------------------|--------------------|--------------------|--------------------|-------------------------------|--------------|
|                              | Not received                               | 0-3 weeks          | 4-7 weeks          | 8-32 weeks         | 33+ weeks                     |              |
| Yes                          | 222 (25.3%)                                | 237 (41.3%)        | 149 (50.0%)        | 299 (62.8%)        | 177 (70.8%)                   | 1084 (43.8%) |
| No                           | 655 (74.7%)                                | 337 (58.7%)        | 149 (50.0%)        | 177 (37.2%)        | 73 (29.2%)                    | 1391 (56.2%) |
| <i>Statistical test</i>      |                                            |                    |                    |                    | $(\chi^2(4)=279.01, p<0.001)$ |              |
| <b>Total: Number (row %)</b> | <b>877 (35.4%)</b>                         | <b>574 (23.2%)</b> | <b>298 (12.0%)</b> | <b>476 (19.2%)</b> | <b>250 (10.1%)</b>            | <b>2475</b>  |

#### Time of latest chemotherapy

|                              | Cut-off points (n=2479): number (column %) |                   |                     |                    | Total                         |
|------------------------------|--------------------------------------------|-------------------|---------------------|--------------------|-------------------------------|
|                              | Not received                               | 0 weeks           | 1-32 weeks          | 33+ weeks          |                               |
| No chemotherapy              | 463 (52.6%)                                | 50 (30.7%)        | 466 (39.4%)         | 66 (26.4%)         | 1045 (42.2%)                  |
| 0-4 weeks                    | 47 (5.3%)                                  | 16 (9.8%)         | 60 (5.1%)           | 6 (2.4%)           | 129 (5.2%)                    |
| 5+ weeks                     | 371 (42.1%)                                | 97 (59.5%)        | 659 (55.6%)         | 178 (71.2%)        | 1305 (52.6%)                  |
| <i>Statistical test</i>      |                                            |                   |                     |                    | $(\chi^2(3)=55.494, p<0.001)$ |
| <b>Total: Number (row %)</b> | <b>881 (35.5%)</b>                         | <b>163 (6.6%)</b> | <b>1185 (47.8%)</b> | <b>250 (10.1%)</b> | <b>2479</b>                   |

#### Avoided emergency hospital admissions 0-4 weeks before death

|                              | Cut-off points (n=2479): number (column %) |                    |                     | Total                         |
|------------------------------|--------------------------------------------|--------------------|---------------------|-------------------------------|
|                              | Not received                               | 0-3 weeks          | 4+ weeks            |                               |
| Yes                          | 704 (79.9%)                                | 392 (68.3%)        | 830 (81.1%)         | 1926 (77.7%)                  |
| No (one or more admission)   | 177 (20.1%)                                | 182 (31.7%)        | 194 (18.9%)         | 553 (22.3%)                   |
| <i>Statistical test</i>      |                                            |                    |                     | $(\chi^2(2)=36.390, p<0.001)$ |
| <b>Total: Number (row %)</b> | <b>881 (35.5%)</b>                         | <b>574 (23.2%)</b> | <b>1024 (41.3%)</b> | <b>2479</b>                   |
